# Supplementary material
Source: PubMed Central journal article supplement (PMC3322238)
Supplement: mmc1.pdf [file mmc1.pdf]

**The American Journal of Human Genetics, Volume 90**

**Supplemental Data**

## **Combined Analysis of Genome-wide Association**

### **Studies for Crohn's Disease and Psoriasis**

#### **Identifies Seven Shared Susceptibility Loci**

**David Ellinghaus, Eva Ellinghaus, Rajan P. Nair, Philip E. Stuart, Tõnu Esko, Andres Metspalu, Sophie Debrus, John V. Raelson, Trilokraj Tejasvi, Majid Belouchi, Sarah L. West, Jonathan N. Barker, Sulev Kõks, Külli Kingo, Tobias Balschun, Orazio Palmieri, Vito Annese, Christian Gieger, H. Erich Wichmann, Michael Kabesch, Richard C. Trembath, Christopher G. Mathew, Gonçalo R. Abecasis, Stephan Weidinger, Susanna Nikolaus, Stefan Schreiber, James T. Elder, Michael Weichenthal, Michael Nothnagel, and Andre Franke**

## **Supplemental Acknowledgments**

The study was supported by the Deutsche Forschungsgemeinschaft (DFG), grant no. FR 2821/2-1, the German Ministry of Education and Research (BMBF) through the National Genome Research Network (NGFN) and the PopGen biobank. The project received infrastructure support through the DFG cluster of excellence “Inflammation at Interfaces”. This work was also supported by the BMBF through an NGFN grant to M.N. (01GS0809). S.W. is supported by a Heisenberg Professorship of the German Research council DFG (WE 2678/4-1). The KORA (Kooperative Gesundheitsforschung in der Region Augsburg) study was initiated and financed by the Helmholtz Zentrum München – National Research Center for Environmental Health, which is funded by the German Federal Ministry of Education, Science, Research and Technology and by the State of Bavaria. Part of this work was financed by the German National Genome Research Network (NGFNPlus: 01GS0823) and was supported within the Munich Center of Health Sciences (MC Health) as part of LMUinnovativ. Funding support for CASP was provided by the US National Institutes of Health and the Foundation for NIH’s Genetic Association Information Network. Sample collection data generation and analysis in the United States were supported by NIH R01 awards AR42742, AR050511, and AR054966, the Ann Arbor Veterans Affairs Hospital, the Dudley and Dawn Holmes Fund, and the Babcock Memorial Trust. EGCUT received financing by FP7 grants (201413, 245536), from Estonian Government SF0180142s08/SF0180043s07 and direct funding from the ministries of research and science and social affairs. EGCUT studies are funded by University of Tartu in the frame of Center of Translational Genomics and by the European Union through the European Regional Development Fund, in the frame of Centre of Excellence in Genomics. The EU European Regional Development Fund together with the Archimedes Foundation supported the Centre of Translational Medicine. Sample collection data generation and analysis in the United Kingdom was supported by the National Institutes of Health Research Biomedical Research

Centre at Guy's and St Thomas' NHS Foundation Trust in partnership with King's College London and the Wellcome Trust Case Control Consortium 2 project (085475/B/08/Z and 085475/Z/08/Z).

(A)

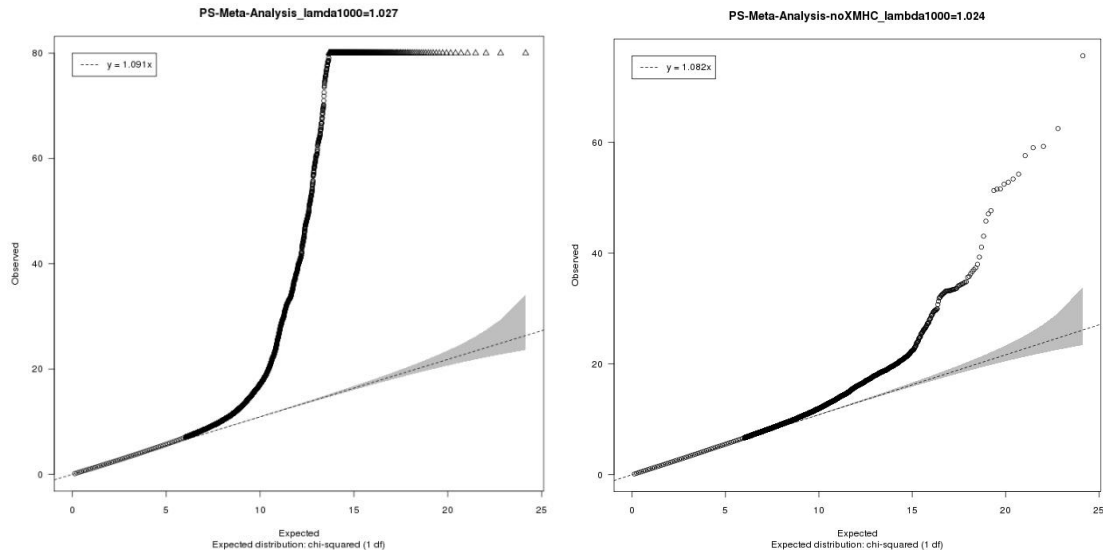

(B)

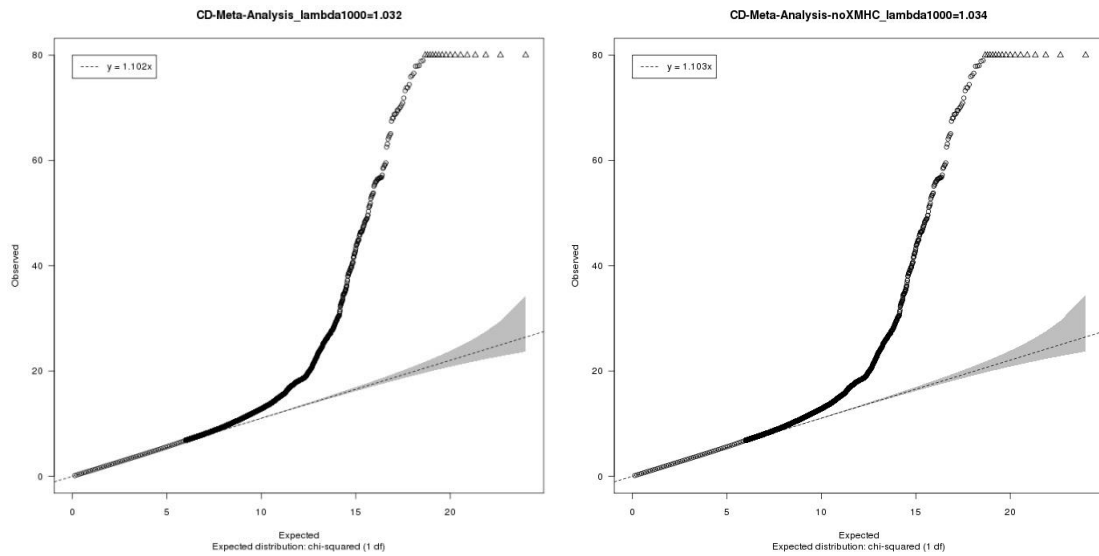

Figure S1. Quantile-Quantile Plots for the Discovery Panels A and B

Only markers that passed the quality criteria were used for plotting. The 2.5th and 97.5th centiles of the distribution under random sampling and the null hypothesis form the 95% concentration band. (A) genome-wide meta-analysis on PS (panel A); first plot of the association test statistics was calculated under inclusion of all SNPs within the extended HLA region (Chr6:25-34Mb),  $\lambda_{1000}=1.027$ . Second plot was calculated under exclusion of all SNPs within the extended HLA region,  $\lambda_{1000}=1.024$ . (B) genome-wide meta-analysis on CD (panel

B); first plot of the association test statistics was calculated under inclusion of all SNPs within the extended HLA region (Chr6:25-34Mb),  $\lambda_{1000}=1.032$ . Second plot was calculated under exclusion of all SNPs within the extended HLA region,  $\lambda_{1000}=1.034$ .

(A)

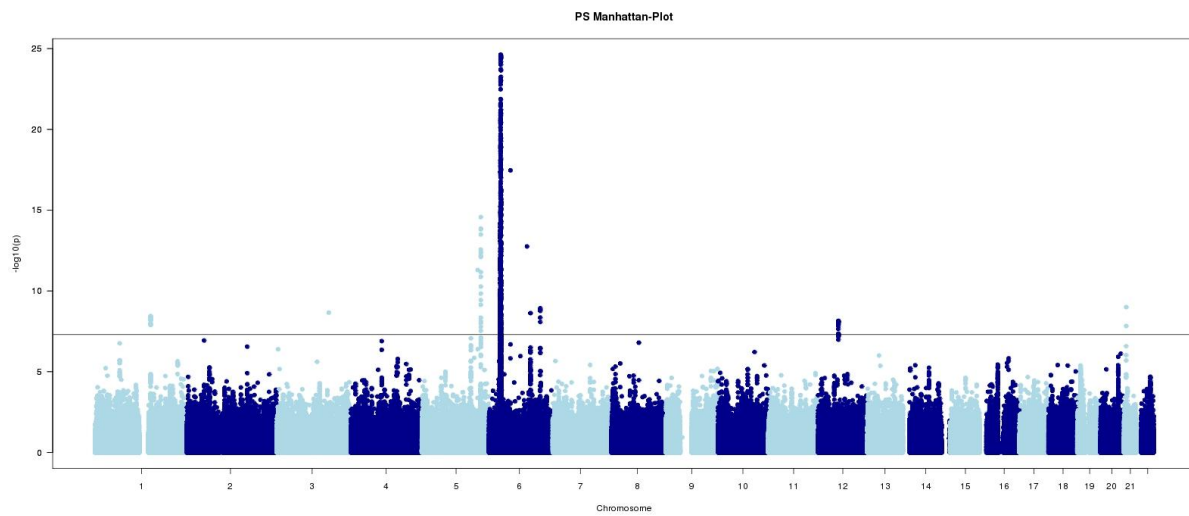

(B)

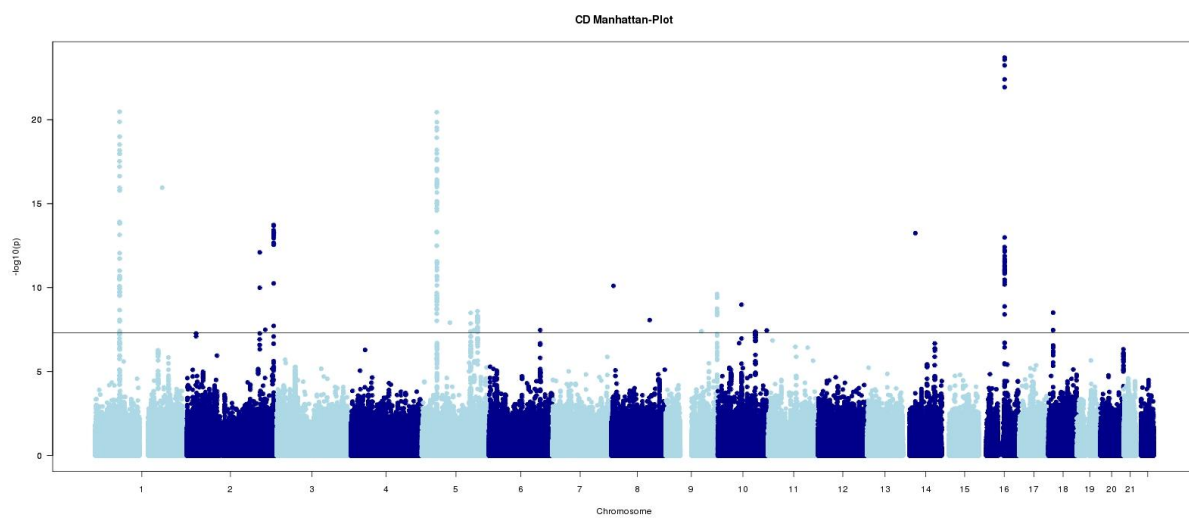

Figure S2. Results of the Genome-Wide Meta-Analysis in Discovery Panels A and B

For each marker,  $-\log_{10}P$  for phenotypic association is depicted with regard to the physical location of that marker (“Manhattan plot”). Only markers that passed the quality criteria were used for plotting. Black horizontal line indicates a genome-wide significance threshold of  $5 \times 10^{-8}$ . (A): PS (panel A); Association signals from the extended HLA region (Chr6:25-34Mb) were truncated at the  $1 \times 10^{-25}$  level. (B): CD (panel B).

(A)

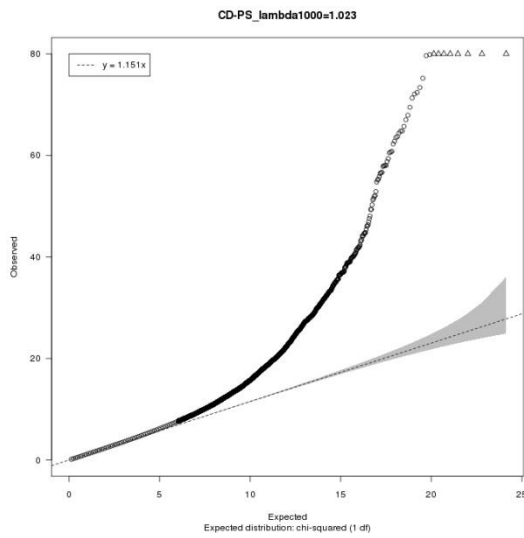

(B)

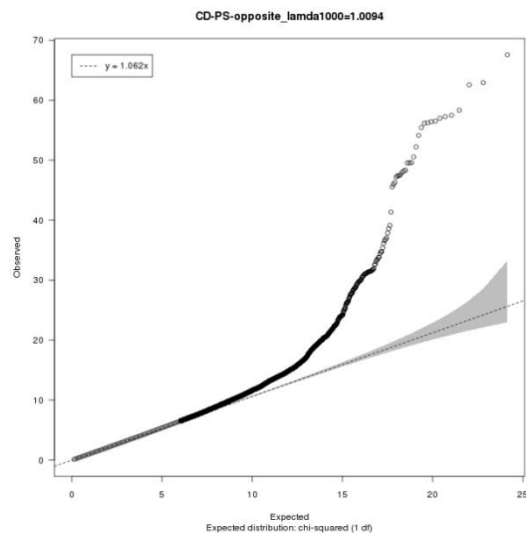

(C)

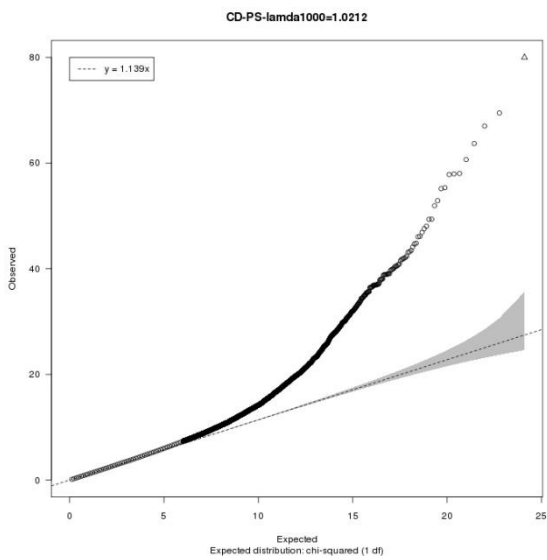

(D)

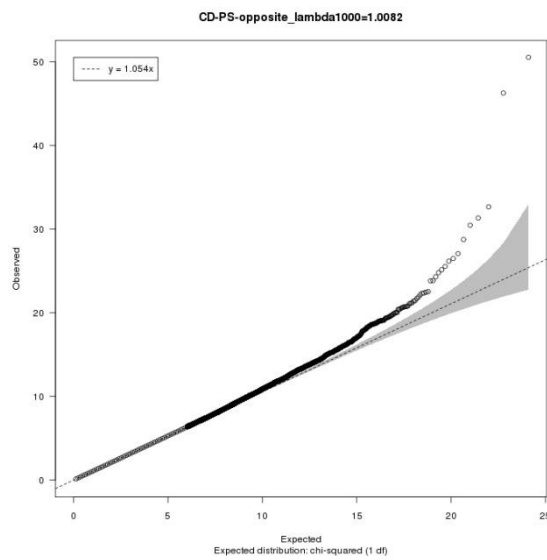

Figure S3. Quantile-quantile (Q-Q) plots for the combined-phenotype analysis (panels A and B)

(A): Same-effect meta-analysis;  $\lambda_{1000}=1.023$ . (B): Opposite-direction meta-analysis;  $\lambda_{1000}=1.009$ . (C): Same-effect meta-analysis after excluding known associated loci for PS and CD;  $\lambda_{1000}=1.021$ . (D): Opposite-effect meta-analysis after excluding known associated loci for PS and CD;  $\lambda_{1000}=1.008$ .

(A)

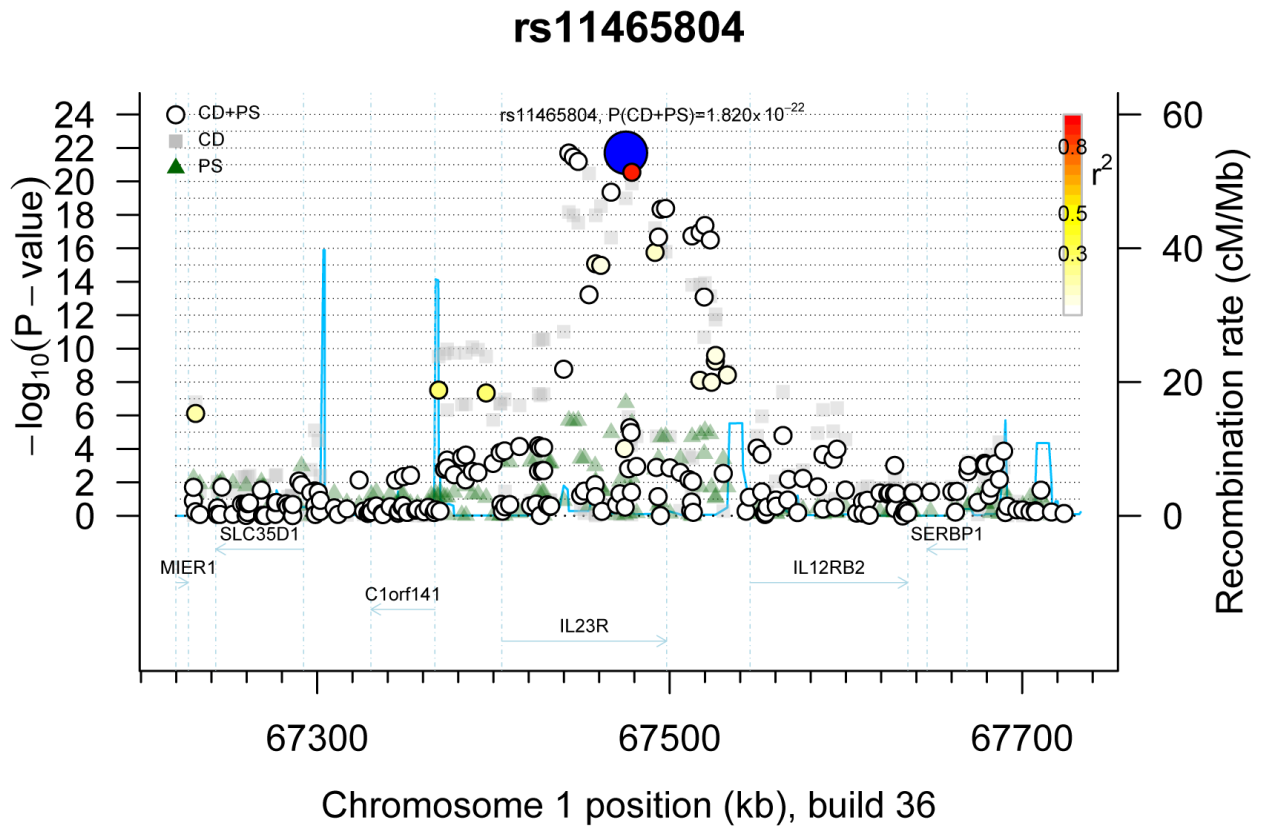

(B)

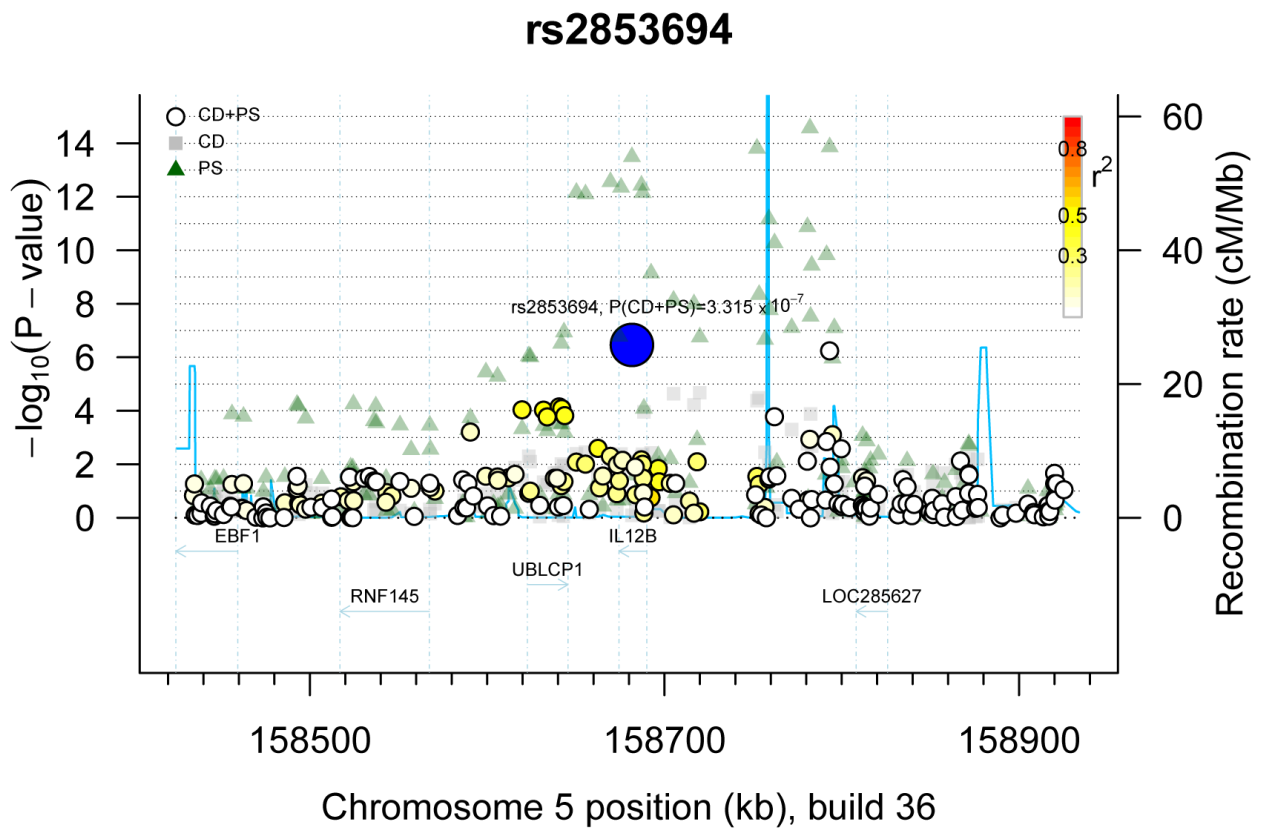



(C)

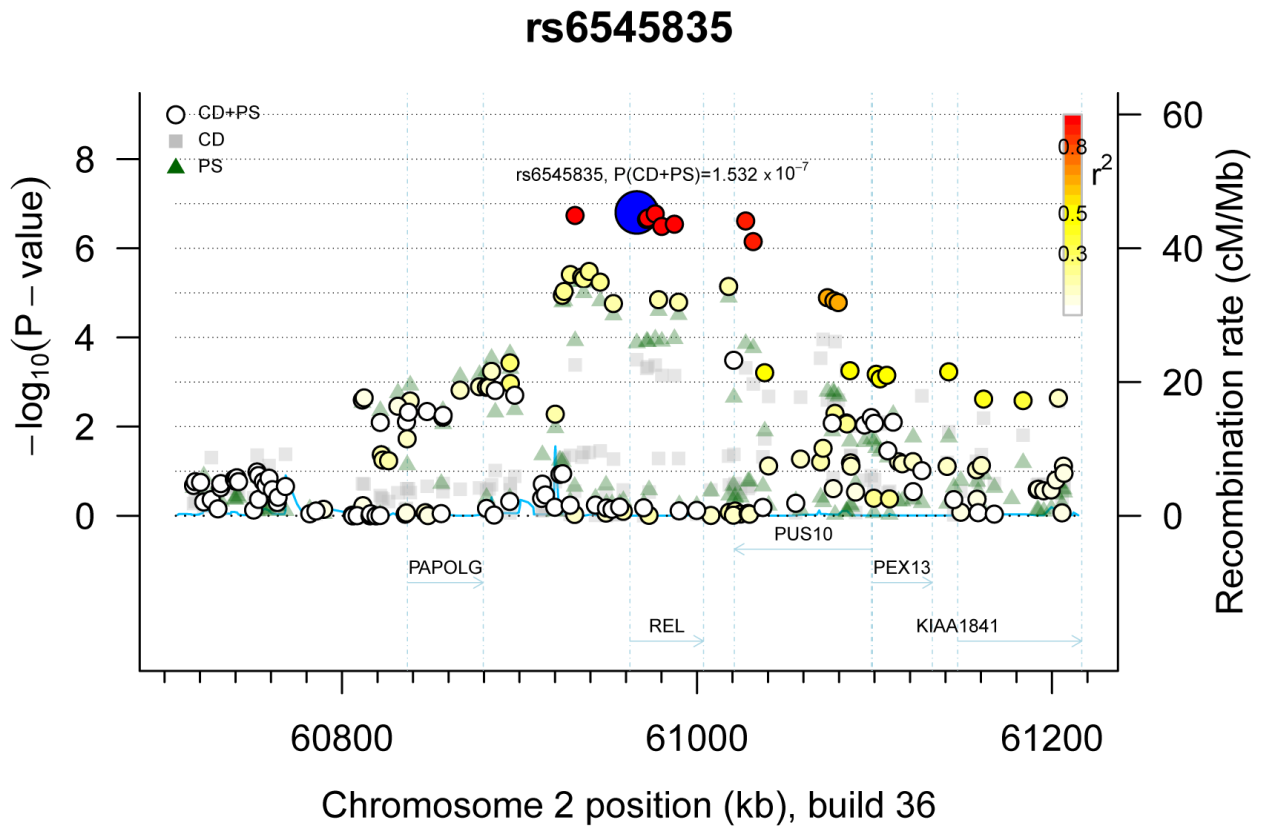

(D)

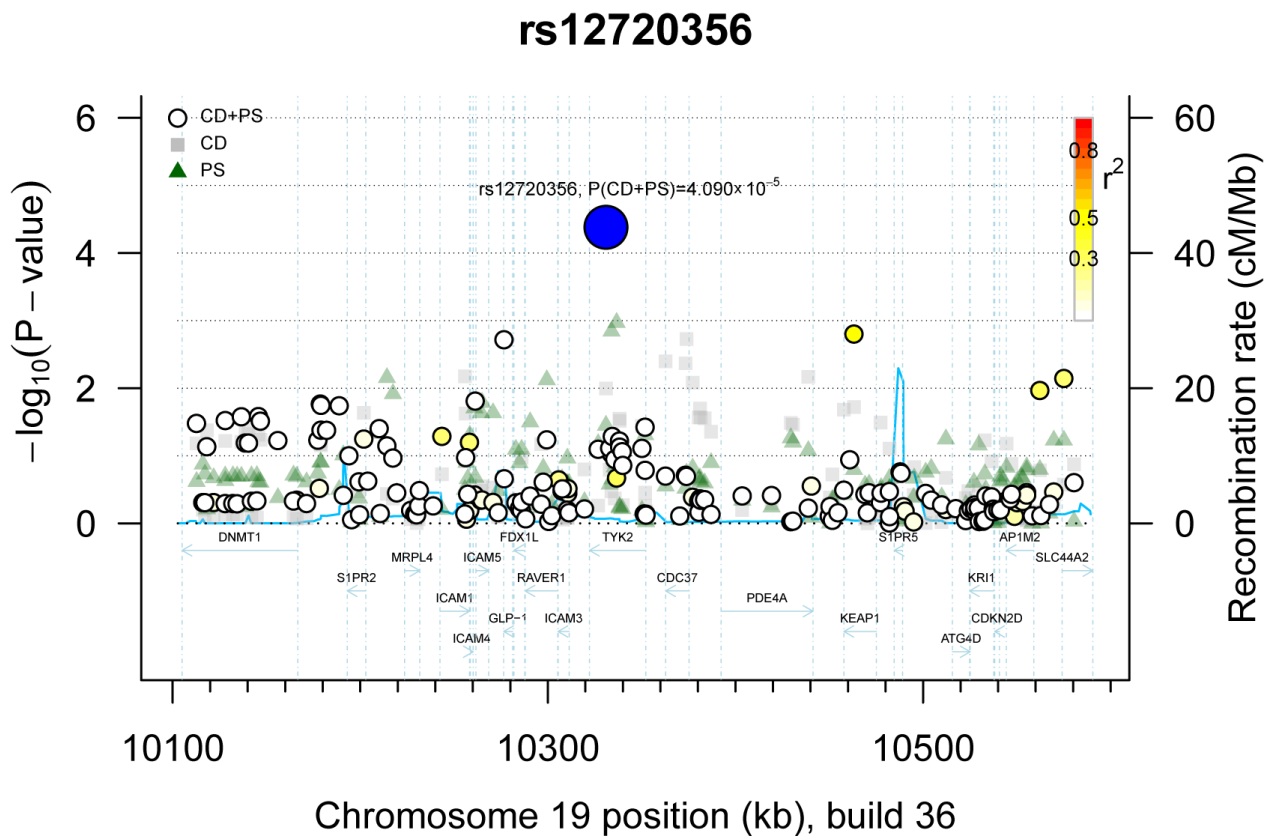

Figure S4. Regional Association Plots of Established Risk Loci Shared between CD and PS (see also Table 1)

(A): 1p31 (*IL23R*); (B): 5p33 (*IL12B*). (C): 2p16 (*REL*). (D): 19p13 (*TYK2*). Plots (A-C) and (D) display the  $-\log_{10}P$ -values from the same- and opposite-direction meta-analysis of CD and PS (panels A and B, Table S1, see also Figure 1), respectively, with regard to the physical location of markers. Imputation of SNP genotypes is based on the HapMap3 reference (see Methods). Blue-filled circle: lead SNP; Other filled circles: analyzed SNPs where the fill color corresponds to the strength of linkage disequilibrium ( $r^2$ ) with the lead SNP (for color coding see legend in the upper right corner of each plot); Green triangles: analyzed SNPs of the meta-analysis on PS (panel A) Gray squares: analyzed SNPs of the meta-analysis on CD (panel B) Blue line: recombination intensity (cM/Mb). Positions and gene annotations are according to NCBI's build 36 (hg18).

(A)

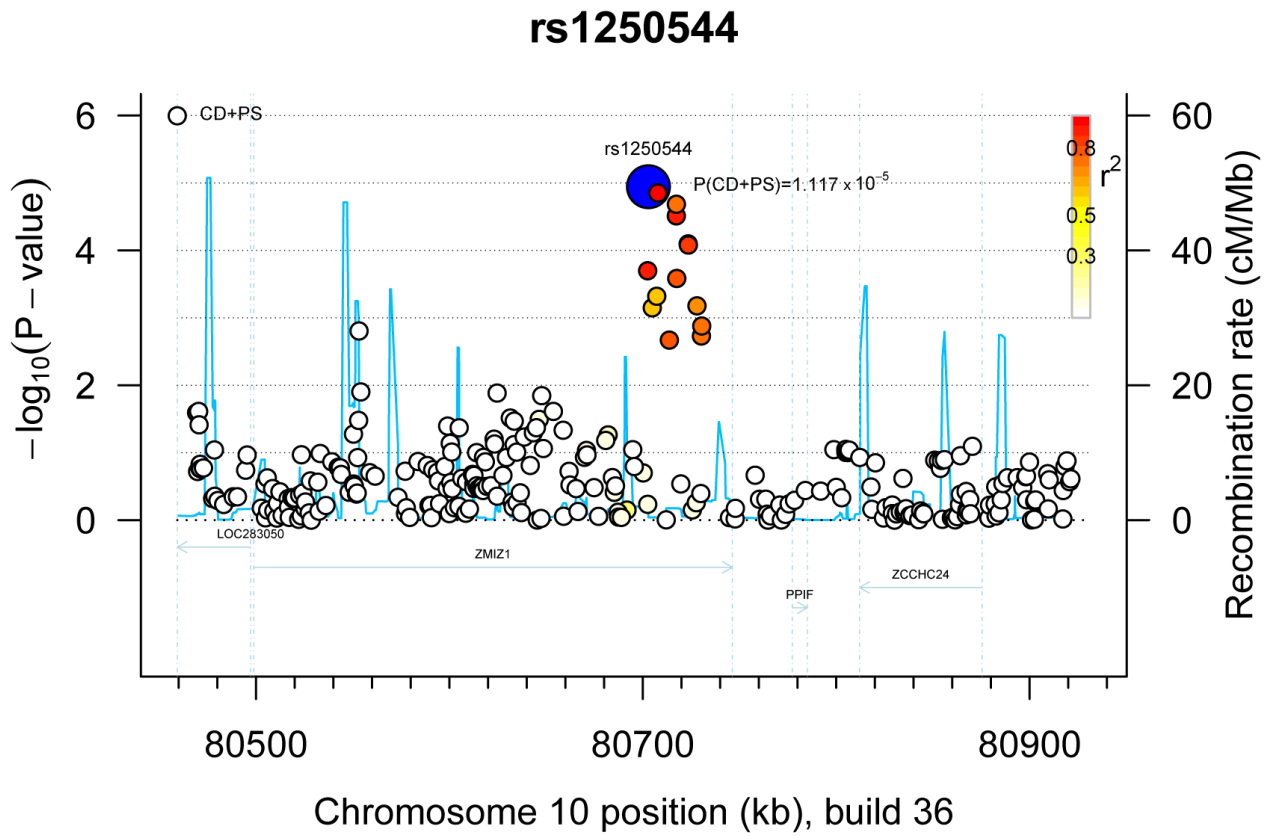

(B)

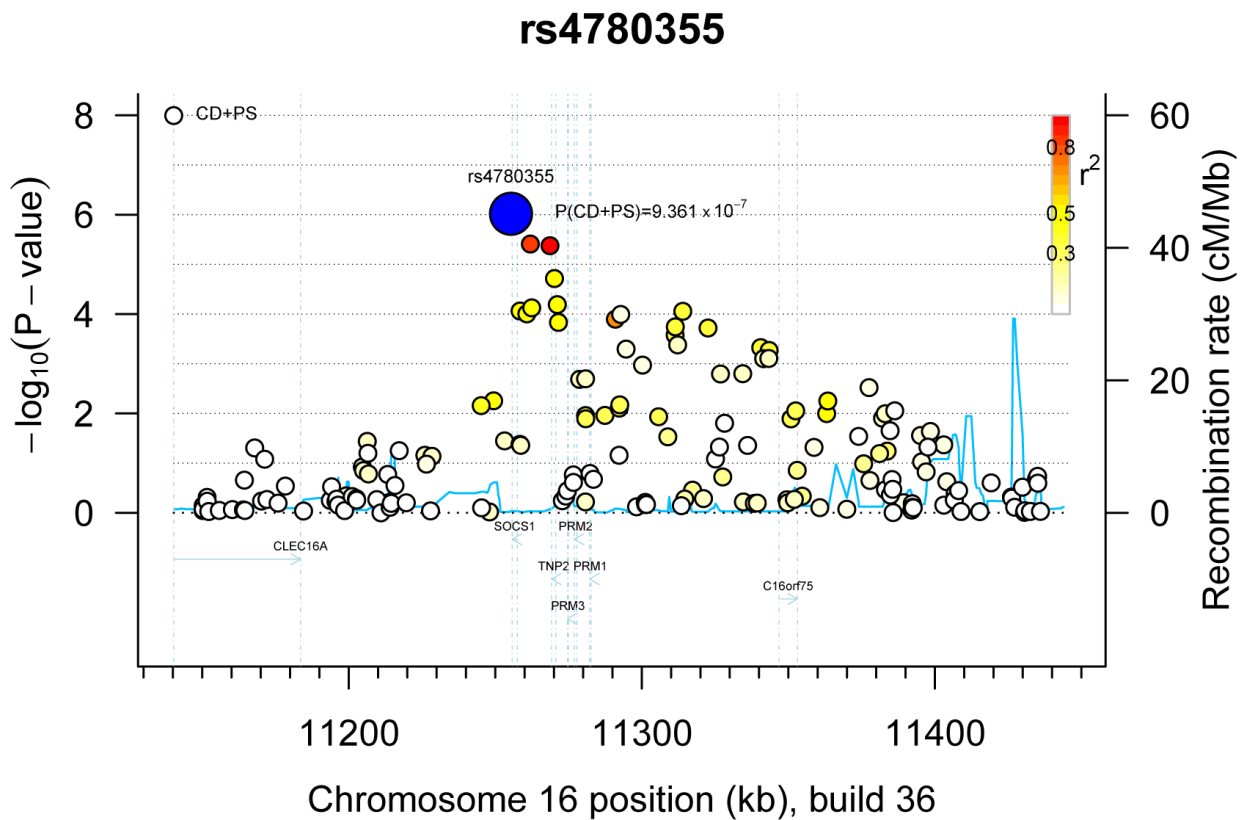

Figure S5. Regional Association Plots of Newly Detected Risk Loci for Both CD and PS

(A): 10q22 (*ZMIZ1*); (B): 16p13 (near *SOCS1*). Shown are the  $-\log_{10}P$ -values from the combined-phenotype GWAS meta-analysis of CD and PS (panels A and B, Table S1, see also Figure 1) with regard to the physical location of markers. Imputation of SNP genotypes is based on the HapMap3 reference (see Methods). Blue-filled circle: lead SNP; Other filled circles: analyzed SNPs where the fill color corresponds to the strength of linkage disequilibrium ( $r^2$ ) with the lead SNP (for color coding see legend in the upper right corner of each plot); Blue line: recombination intensity (cM/Mb). Positions and gene annotations are according to NCBI's build 36 (hg18).

## rs2304256–rs11879191

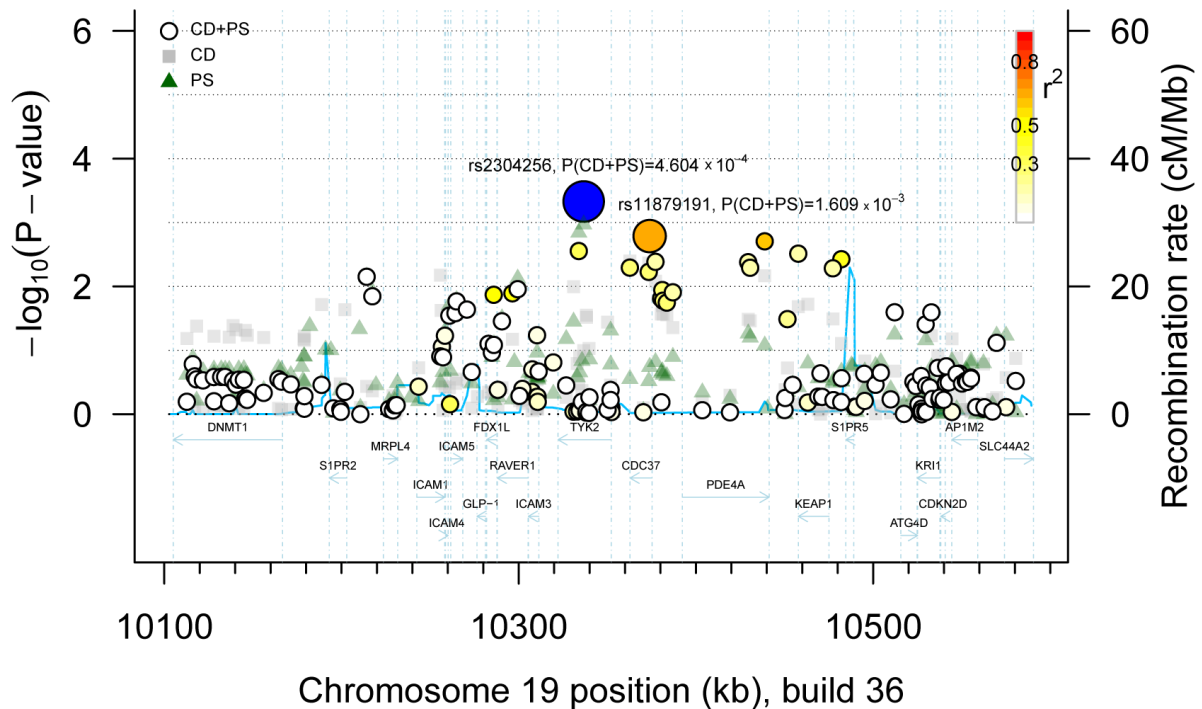

Figure S6. Regional Association Plot of the Risk Locus at 19p13 Shared between CD and PS

Shown are the  $-\log_{10}P$ -values from the combined-phenotype GWAS meta-analysis of CD and PS (panels A and B, Table S1, see also Figure 1) considering same direction of effects with regard to the physical location of markers. Imputation of SNP genotypes is based on the HapMap3 reference (see Methods). Blue-filled circle: lead SNP; Other filled circles: analyzed SNPs where the fill color corresponds to the strength of linkage disequilibrium ( $r^2$ ) with the lead SNP (for color coding see legend in the upper right corner of each plot); Green triangles: analyzed SNPs of the meta-analysis on PS (panel A) Gray squares: analyzed SNPs of the meta-analysis on CD (panel B) Blue line: recombination intensity (cM/Mb). Positions and gene annotations are according to NCBI's build 36 (hg18).

Table S1. Case/Control Panels Used in the Analysis

Panel A: Discovery panel after quality control for GWAS meta-analysis on psoriasis (PS).

| Index GWAS           | #Cases | #Controls | GWAS platform                                |
|----------------------|--------|-----------|----------------------------------------------|
| Germany              | 469    | 2646      | Illumina 550k, Illumina 330k, Affymetrix 6.0 |
| United States (CASP) | 757    | 987       | Perlegen Sciences                            |
| Canada (Genizon)     | 1303   | 1322      | Illumina 1M                                  |
| Total                | 2529   | 4955      |                                              |

Panel B: Discovery panel after quality control for GWAS meta-analysis on Crohn's disease (CD).

| Index GWAS | #Cases | #Controls | GWAS platform                               |
|------------|--------|-----------|---------------------------------------------|
| Germany    | 480    | 2645      | Illumina550k, Illumina 300k, Affymetrix 6.0 |
| UK (WTCCC) | 1662   | 2860      | Affymetrix 500k                             |
| Total      | 2142   | 5505      |                                             |

Panel C: Replication panel after quality control for PS (*OVERLAP* approach).

| Replication country | Disease | #Cases | #Controls |
|---------------------|---------|--------|-----------|
| Germany             | PS      | 674    | 1984      |
| Estonia             | PS      | 1126   | 960       |
| United States       | PS      | 2137   | 1903      |
| United Kingdom      | PS      | 2178   | 2657      |
| Total               | PS      | 6115   | 7504      |

Panel D: Replication panel for CD and PS after quality control (*COMBINED* approach).

| Replication country | Disease | #Cases | #Controls |
|---------------------|---------|--------|-----------|
| Germany             | CD      | 1713   | 1463      |
| Germany             | PS      | 596    | 1853      |
| Estonia             | PS      | 413    | 249       |
| Total               |         | 2722   | 3565      |

Panel E: Replication panel for CD and PS after quality control (*COMBINED* approach).

| Replication country | Disease | #Cases | #Controls |
|---------------------|---------|--------|-----------|
| Germany             | CD      | 1672   | 136       |
| Italy               | CD      | 688    | 879       |
| United Kingdom      | PS      | 2178   | 2657      |
| Total               |         | 4538   | 3672      |

Table S2. Results of same-effect analysis of the combined-phenotype (*COMBINED* approach) and of the replication in panel D (see Table S1D).

part 1

| Chr | SNP                    | A1 | Locus            | CD+PS Discovery GWAS<br>(4,671/10,460) |      | PS GWAS (2,529/4,955)  |      | CD GWAS (2,142/5,505)  |      | PS Replication<br>(1,009/2,102) |      | CD Replication<br>(1,713/1,463) |      |
|-----|------------------------|----|------------------|----------------------------------------|------|------------------------|------|------------------------|------|---------------------------------|------|---------------------------------|------|
|     |                        |    |                  | P                                      | OR   | P                      | OR   | P                      | OR   | P                               | OR   | P                               | OR   |
| 1   | rs10489873             | A  | <i>RGS1</i>      | 7.42×10 <sup>-06</sup>                 | 0.74 | 3.18×10 <sup>-04</sup> | 0.73 | 7.51×10 <sup>-03</sup> | 0.75 | 3.07×10 <sup>-01</sup>          | 1.13 | 1.58×10 <sup>-01</sup>          | 1.15 |
| 1   | rs2208843              | G  | <i>NFASC</i>     | 5.83×10 <sup>-05</sup>                 | 0.83 | 1.70×10 <sup>-04</sup> | 0.77 | 4.71×10 <sup>-02</sup> | 0.88 | 1.37×10 <sup>-01</sup>          | 0.86 | 2.61×10 <sup>-01</sup>          | 0.91 |
| 2   | rs10184619             | C  | <i>BRE</i>       | 5.85×10 <sup>-06</sup>                 | 0.88 | 1.53×10 <sup>-03</sup> | 0.88 | 1.19×10 <sup>-03</sup> | 0.88 | 9.74×10 <sup>-01</sup>          | 1.00 | 3.15×10 <sup>-01</sup>          | 0.95 |
| 2   | rs4851527              | A  | <i>IL1R2</i>     | 2.26×10 <sup>-05</sup>                 | 1.12 | 3.16×10 <sup>-04</sup> | 1.15 | 1.59×10 <sup>-02</sup> | 1.09 | 5.56×10 <sup>-01</sup>          | 0.97 | 1.56×10 <sup>-01</sup>          | 1.07 |
| 5   | rs10053519             | G  | -                | 4.42×10 <sup>-06</sup>                 | 1.14 | 1.09×10 <sup>-04</sup> | 1.16 | 9.19×10 <sup>-03</sup> | 1.11 | 9.89×10 <sup>-01</sup>          | 1.00 | 8.91×10 <sup>-01</sup>          | 0.99 |
| 7   | rs2255323              | C  | <i>GPR85</i>     | 8.86×10 <sup>-09</sup>                 | 0.80 | 4.13×10 <sup>-05</sup> | 0.83 | 2.74×10 <sup>-05</sup> | 0.75 | 3.85×10 <sup>-01</sup>          | 0.95 | 4.46×10 <sup>-02</sup>          | 0.89 |
| 9   | rs886017               | G  | <i>RALGDS</i>    | 1.43×10 <sup>-05</sup>                 | 0.88 | 9.31×10 <sup>-05</sup> | 0.85 | 2.75×10 <sup>-02</sup> | 0.91 | 8.32×10 <sup>-01</sup>          | 0.99 | 2.61×10 <sup>-01</sup>          | 1.06 |
| 9   | rs11574906             | T  | <i>NOTCH1</i>    | 2.74×10 <sup>-07</sup>                 | 1.31 | 1.90×10 <sup>-03</sup> | 1.31 | 1.46×10 <sup>-05</sup> | 1.59 | 5.45×10 <sup>-02</sup>          | 0.84 | 1.57×10 <sup>-01</sup>          | 0.89 |
| 10  | rs7071642 <sup>a</sup> | A  | <i>ZNF365</i>    | 3.41×10 <sup>-08</sup>                 | 1.42 | 1.17×10 <sup>-04</sup> | 1.18 | 7.70×10 <sup>-05</sup> | 1.19 | 2.43×10 <sup>-01</sup>          | 1.08 | 3.22×10 <sup>-03</sup>          | 1.19 |
| 10  | rs2675671              | C  | <i>CAMK2G</i>    | 3.89×10 <sup>-06</sup>                 | 0.87 | 4.05×10 <sup>-04</sup> | 0.87 | 2.74×10 <sup>-03</sup> | 0.89 | 4.88×10 <sup>-01</sup>          | 0.96 | 3.79×10 <sup>-01</sup>          | 0.96 |
| 10  | rs1250544 <sup>a</sup> | G  | <i>ZMIZ1</i>     | 1.12×10 <sup>-05</sup>                 | 1.14 | 3.85×10 <sup>-05</sup> | 1.18 | 3.31×10 <sup>-02</sup> | 1.09 | 1.99×10 <sup>-04</sup>          | 1.25 | 2.60×10 <sup>-03</sup>          | 1.17 |
| 10  | rs1250550 <sup>a</sup> | C  | <i>ZMIZ1</i>     | 1.52×10 <sup>-03</sup>                 | 1.11 | 1.53×10 <sup>-02</sup> | 1.11 | 4.05×10 <sup>-02</sup> | 1.10 | 5.05×10 <sup>-03</sup>          | 1.19 | 4.75×10 <sup>-04</sup>          | 1.21 |
| 10  | rs12415344             | G  | <i>SORCS1</i>    | 9.38×10 <sup>-05</sup>                 | 0.41 | 4.93×10 <sup>-04</sup> | 0.30 | 3.35×10 <sup>-02</sup> | 0.52 | 4.36×10 <sup>-01</sup>          | 0.79 | 2.57×10 <sup>-01</sup>          | 1.42 |
| 11  | rs10836477             | T  | <i>LDLRAD3</i>   | 4.12×10 <sup>-06</sup>                 | 0.88 | 5.36×10 <sup>-03</sup> | 0.90 | 2.03×10 <sup>-04</sup> | 0.87 | 8.00×10 <sup>-01</sup>          | 1.02 | 2.73×10 <sup>-01</sup>          | 1.06 |
| 12  | rs12580100             | A  | <i>IKZF4</i>     | 6.18×10 <sup>-07</sup>                 | 1.29 | 9.24×10 <sup>-05</sup> | 1.32 | 1.80×10 <sup>-03</sup> | 1.26 | 2.22×10 <sup>-01</sup>          | 1.11 | 6.87×10 <sup>-01</sup>          | 1.03 |
| 15  | rs2016902              | G  | <i>PAK6</i>      | 1.42×10 <sup>-06</sup>                 | 0.38 | 2.88×10 <sup>-05</sup> | 0.33 | 1.08×10 <sup>-02</sup> | 0.46 | 5.86×10 <sup>-01</sup>          | 0.86 | 8.94×10 <sup>-01</sup>          | 0.95 |
| 16  | rs4780355              | T  | <i>SOCS1</i>     | 9.36×10 <sup>-07</sup>                 | 1.16 | 1.72×10 <sup>-04</sup> | 1.18 | 1.47×10 <sup>-03</sup> | 1.15 | 6.89×10 <sup>-02</sup>          | 1.12 | 4.84×10 <sup>-06</sup>          | 1.28 |
| 19  | rs10405308             | G  | <i>LOC401895</i> | 1.81×10 <sup>-07</sup>                 | 0.60 | 6.54×10 <sup>-04</sup> | 0.59 | 7.72×10 <sup>-05</sup> | 0.60 | 2.29×10 <sup>-01</sup>          | 0.85 | 7.45×10 <sup>-01</sup>          | 0.96 |



part 2

| Chr | SNP                    | A1 | Locus            | PS GWAS & Repl         |      | CD GWAS & Repl         |      | CD+PS GWAS&Repl        |      | Status now   |
|-----|------------------------|----|------------------|------------------------|------|------------------------|------|------------------------|------|--------------|
|     |                        |    |                  | (3,538/7,057)          |      | (3,855/6,968)          |      | (7,393/14,025)         |      |              |
|     |                        |    |                  | P                      | OR   | P                      | OR   | P                      | OR   |              |
| 1   | rs10489873             | A  | <i>RGS1</i>      | 2.18×10 <sup>-02</sup> | 0.85 | 4.39×10 <sup>-01</sup> | 0.94 | 2.81×10 <sup>-02</sup> | 0.89 |              |
| 1   | rs2208843              | G  | <i>NFASC</i>     | 8.56×10 <sup>-05</sup> | 0.80 | 2.37×10 <sup>-02</sup> | 0.89 | 1.54×10 <sup>-05</sup> | 0.85 | -            |
| 2   | rs10184619             | C  | <i>BRE</i>       | 9.43×10 <sup>-03</sup> | 0.92 | 1.54×10 <sup>-03</sup> | 0.91 | 4.44×10 <sup>-05</sup> | 0.91 | -            |
| 2   | rs4851527              | A  | <i>IL1R2</i>     | 7.82×10 <sup>-03</sup> | 1.09 | 5.44×10 <sup>-03</sup> | 1.09 | 1.20×10 <sup>-04</sup> | 1.09 | -            |
| 5   | rs10053519             | G  | -                | 1.29×10 <sup>-03</sup> | 1.11 | 5.02×10 <sup>-02</sup> | 1.06 | 2.63×10 <sup>-04</sup> | 1.09 | -            |
| 7   | rs2255323              | C  | <i>GPR85</i>     | 1.18×10 <sup>-04</sup> | 0.86 | 2.02×10 <sup>-05</sup> | 0.83 | 1.23×10 <sup>-08</sup> | 0.85 | -            |
| 9   | rs886017               | G  | <i>RALGDS</i>    | 8.66×10 <sup>-04</sup> | 0.90 | 3.20×10 <sup>-01</sup> | 0.97 | 2.42×10 <sup>-03</sup> | 0.93 | -            |
| 9   | rs11574906             | T  | <i>NOTCH1</i>    | 3.36×10 <sup>-01</sup> | 1.06 | 1.32×10 <sup>-01</sup> | 1.10 | 8.18×10 <sup>-02</sup> | 1.14 | -            |
| 10  | rs7071642 <sup>a</sup> | A  | <i>ZNF365</i>    | 1.19×10 <sup>-04</sup> | 1.15 | 8.25×10 <sup>-07</sup> | 1.19 | 5.03×10 <sup>-10</sup> | 1.17 | CD           |
| 10  | rs2675671              | C  | <i>CAMK2G</i>    | 8.69×10 <sup>-04</sup> | 0.90 | 3.46×10 <sup>-03</sup> | 0.91 | 1.02×10 <sup>-05</sup> | 0.91 | -            |
| 10  | rs1250544 <sup>a</sup> | G  | <i>ZMIZ1</i>     | 3.90×10 <sup>-08</sup> | 1.20 | 4.47×10 <sup>-04</sup> | 1.12 | 2.66×10 <sup>-10</sup> | 1.17 | CD, PS, CDPS |
| 10  | rs1250550 <sup>a</sup> | C  | <i>ZMIZ1</i>     | 3.00×10 <sup>-04</sup> | 1.14 | 1.14×10 <sup>-04</sup> | 1.15 | 1.26×10 <sup>-07</sup> | 1.14 | CD           |
| 10  | rs12415344             | G  | <i>SORCS1</i>    | 4.29×10 <sup>-03</sup> | 0.53 | 4.75×10 <sup>-01</sup> | 0.86 | 1.22×10 <sup>-02</sup> | 0.68 | -            |
| 11  | rs10836477             | T  | <i>LDLRAD3</i>   | 3.03×10 <sup>-02</sup> | 0.93 | 2.02×10 <sup>-02</sup> | 0.93 | 1.49×10 <sup>-03</sup> | 0.93 | -            |
| 12  | rs12580100             | A  | <i>IKZF4</i>     | 1.58×10 <sup>-04</sup> | 1.23 | 1.21×10 <sup>-02</sup> | 1.14 | 9.05×10 <sup>-06</sup> | 1.18 | -            |
| 15  | rs2016902              | G  | <i>PAK6</i>      | 6.21×10 <sup>-04</sup> | 0.51 | 3.86×10 <sup>-02</sup> | 0.62 | 7.65×10 <sup>-05</sup> | 0.55 | -            |
| 16  | rs4780355              | T  | <i>SOCS1</i>     | 3.67×10 <sup>-05</sup> | 1.16 | 1.01×10 <sup>-07</sup> | 1.20 | 2.02×10 <sup>-11</sup> | 1.18 | -            |
| 19  | rs10405308             | G  | <i>LOC401895</i> | 1.62×10 <sup>-03</sup> | 0.73 | 2.15×10 <sup>-03</sup> | 0.76 | 1.14×10 <sup>-05</sup> | 0.74 | -            |

Chr: chromosome of marker; SNP: rs ID; A1: minor allele; Locus: one candidate gene in the region; P/OR: *P*-value and corresponding odds ratio with respect to minor allele for the combined-phenotype GWAS meta-analysis of CD and PS (panel A&B), GWAS meta-analysis of PS (panel A), GWAS meta-analysis of CD (panel B), PS replication analysis (as part of panel D), CD replication analysis (part of panel D), combined analysis of PS GWAS meta-analysis (panel A) and PS replication (part of panel D), combined analysis of CD GWAS meta-analysis (panel B) and CD replication (part of panel D), combined analysis of CD+PS GWAS meta-analysis (panel A&B) and CD+PS replication (panel D). For each panel, numbers of cases/controls are displayed in parentheses. Status now: status of association with CD and/or PS. <sup>a</sup> SNPs are located inside established CD risk loci with  $P < 5 \times 10^{-8}$ .

Table S3. Results of opposite-effect analysis of the combined-phenotype (*COMBINED* approach) and of the replication in panel D (see Table S1D).

part 1

| Chr | SNP       | A1 | Locus          | CD+PS Discovery GWAS<br>(4,671/10,460) |      | PS GWAS (2,529/4,955)  |      | CD GWAS (2,142/5,505)  |      | PS Replication<br>(1,009/2,102) |      | CD Replication<br>(1,713/1,463) |      |
|-----|-----------|----|----------------|----------------------------------------|------|------------------------|------|------------------------|------|---------------------------------|------|---------------------------------|------|
|     |           |    |                | P                                      | OR   | P                      | OR   | P                      | OR   | P                               | OR   | P                               | OR   |
| 1   | rs7667    | G  | <i>CAPZB</i>   | 3.61×10 <sup>-06</sup>                 | 1.14 | 3.22×10 <sup>-04</sup> | 0.86 | 3.06×10 <sup>-03</sup> | 0.89 | 5.39×10 <sup>-02</sup>          | 0.89 | 8.92×10 <sup>-01</sup>          | 0.99 |
| 3   | rs1386478 | A  | <i>ZDHHC23</i> | 6.34×10 <sup>-07</sup>                 | 0.86 | 1.03×10 <sup>-04</sup> | 1.19 | 1.53×10 <sup>-03</sup> | 1.15 | 2.73×10 <sup>-01</sup>          | 1.07 | 9.27×10 <sup>-01</sup>          | 0.99 |
| 4   | rs7677254 | C  | <i>FAT4</i>    | 1.49×10 <sup>-05</sup>                 | 0.87 | 3.74×10 <sup>-03</sup> | 1.16 | 1.21×10 <sup>-03</sup> | 1.14 | 3.23×10 <sup>-01</sup>          | 1.06 | 6.20×10 <sup>-01</sup>          | 0.98 |

part 2

| Chr | SNP       | A1 | Locus          | PS GWAS & Repl<br>(3,538/7,057) |      | CD GWAS & Repl<br>(3,855/6,968) |      | CD+PS GWAS&Repl<br>(7,393/14,025) |      | Status now |
|-----|-----------|----|----------------|---------------------------------|------|---------------------------------|------|-----------------------------------|------|------------|
|     |           |    |                | P                               | OR   | P                               | OR   | P                                 | OR   |            |
| 1   | rs7667    | G  | <i>CAPZB</i>   | 4.89×10 <sup>-05</sup>          | 0.87 | 1.38×10 <sup>-02</sup>          | 0.92 | 8.11×10 <sup>-06</sup>            | 0.90 | -          |
| 3   | rs1386478 | A  | <i>ZDHHC23</i> | 1.33×10 <sup>-04</sup>          | 1.15 | 1.44×10 <sup>-02</sup>          | 1.09 | 7.40×10 <sup>-06</sup>            | 1.12 | -          |
| 4   | rs7677254 | C  | <i>FAT4</i>    | 4.89×10 <sup>-03</sup>          | 1.11 | 2.36×10 <sup>-02</sup>          | 1.07 | 6.54×10 <sup>-05</sup>            | 1.10 | -          |

Chr: chromosome of marker; SNP: rs ID; A1: minor allele; Locus: one candidate gene in the region; P/OR: *P*-value and corresponding odds ratio with respect to minor allele for the combined-phenotype GWAS meta-analysis of CD and PS (panel A&B), GWAS meta-analysis of PS (panel A), GWAS meta-analysis of CD (panel B), PS replication analysis (as part of panel D), CD replication analysis (part of panel D), combined analysis of PS GWAS meta-analysis (panel A) and PS replication (part of panel D), combined analysis of CD GWAS meta-analysis (panel B) and CD replication (part of panel D), combined analysis of CD+PS GWAS meta-analysis (panel A&B) and CD+PS replication (panel D). For each panel, numbers of cases/controls are displayed in parentheses. Status now: status of association with CD and/or PS. For CD GWAS and CD replication data, minor and major alleles were flipped in order to calculate *P*-value (*P*) and odds ratio (*OR*) (see Methods).

Table S4. Results of *in-silico* expression quantitative trait locus (eQTL) analysis using the mRNAbySNPBrowser software <sup>2</sup> with significant evidence ( $P_{\text{Expression}} < 1 \times 10^{-4}$ ) for differential expression.

| Probe-ID     | Marker     | Chr | Pos      | Allele | Effect | H2    | LOD  | P-value   |
|--------------|------------|-----|----------|--------|--------|-------|------|-----------|
| 227941_at    | rs10181042 | 2   | 61135910 | C      | 0.43   | 8.71  | 5.40 | 6.10E-007 |
| 1568658_at   | rs10181042 | 2   | 61135910 | C      | -0.565 | 15.11 | 9.57 | 3.10E-011 |
| 201039_s_at  | rs1250546  | 10  | 80702538 | T      | -0.307 | 4.61  | 4.01 | 1.70E-005 |
| 212124_at    | rs1250546  | 10  | 80702538 | T      | -0.277 | 3.76  | 3.37 | 8.10E-005 |
| 228949_at    | rs1250559  | 10  | 80723566 | C      | 0.289  | 3.93  | 3.43 | 7.00E-005 |
| 221006_s_at  | rs1250559  | 10  | 80723566 | C      | -0.296 | 4.13  | 3.43 | 7.00E-005 |
| 1569053_at   | rs243323   | 16  | 11268703 | A      | -0.33  | 4.53  | 3.34 | 8.80E-005 |
| 241338_at    | rs243323   | 16  | 11268703 | A      | 0.328  | 4.48  | 3.45 | 6.60E-005 |
| AVG_HSPA12A  | rs243323   | 16  | 11268703 | A      | 0.33   | 4.53  | 3.58 | 4.90E-005 |
| 221578_at    | rs243323   | 16  | 11268703 | A      | 0.344  | 4.96  | 3.55 | 5.30E-005 |
| 233648_at    | rs243323   | 16  | 11268703 | A      | -0.326 | 4.46  | 3.34 | 8.80E-005 |
| AVG_NRK      | rs243323   | 16  | 11268703 | A      | 0.349  | 5.05  | 3.71 | 3.60E-005 |
| 226456_at    | rs243323   | 16  | 11268703 | A      | 0.481  | 9.67  | 6.95 | 1.50E-008 |
| 227164_at    | rs243323   | 16  | 11268703 | A      | -0.331 | 4.57  | 3.45 | 6.60E-005 |
| 228921_at    | rs243323   | 16  | 11268703 | A      | 0.337  | 4.75  | 3.73 | 3.40E-005 |
| 215170_s_at  | rs243323   | 16  | 11268703 | A      | -0.337 | 4.71  | 3.47 | 6.30E-005 |
| 237383_at    | rs243323   | 16  | 11268703 | A      | -0.351 | 5.13  | 3.68 | 3.80E-005 |
| AVG_TMEM22   | rs243323   | 16  | 11268703 | A      | -0.344 | 4.96  | 3.66 | 4.00E-005 |
| 1558595_at   | rs243323   | 16  | 11268703 | A      | 0.326  | 4.46  | 3.49 | 6.10E-005 |
| 1565567_at   | rs243323   | 16  | 11268703 | A      | -0.349 | 5.11  | 3.72 | 3.50E-005 |
| 226651_at    | rs243323   | 16  | 11268703 | A      | -0.34  | 4.8   | 3.59 | 4.80E-005 |
| 242819_at    | rs243323   | 16  | 11268703 | A      | -0.337 | 4.73  | 3.37 | 8.10E-005 |
| 38487_at     | rs243323   | 16  | 11268703 | A      | 0.333  | 4.65  | 3.41 | 7.40E-005 |
| 242241_x_at  | rs243323   | 16  | 11268703 | A      | -0.328 | 4.48  | 3.30 | 9.70E-005 |
| AVG_MGC24665 | rs243323   | 16  | 11268703 | A      | 0.486  | 9.85  | 7.11 | 1.10E-008 |
| 223981_at    | rs243323   | 16  | 11268703 | A      | -0.34  | 4.82  | 3.56 | 5.20E-005 |

|              |          |    |          |   |        |      |      |           |
|--------------|----------|----|----------|---|--------|------|------|-----------|
| AVG_HEL308   | rs243323 | 16 | 11268703 | A | -0.342 | 4.86 | 3.60 | 4.60E-005 |
| 241893_at    | rs243323 | 16 | 11268703 | A | -0.34  | 4.82 | 3.50 | 6.00E-005 |
| AVG_KIAA0974 | rs243323 | 16 | 11268703 | A | -0.344 | 4.96 | 3.65 | 4.10E-005 |
| 1553900_s_at | rs243323 | 16 | 11268703 | A | 0.367  | 5.61 | 4.32 | 8.20E-006 |
| 241988_x_at  | rs243323 | 16 | 11268703 | A | -0.351 | 5.15 | 4.03 | 1.70E-005 |
| 206727_at    | rs243323 | 16 | 11268703 | A | 0.361  | 5.42 | 3.92 | 2.10E-005 |
| 1565830_at   | rs243323 | 16 | 11268703 | A | -0.333 | 4.65 | 3.50 | 6.00E-005 |
| AVG_SOX3     | rs243323 | 16 | 11268703 | A | 0.337  | 4.73 | 3.56 | 5.20E-005 |
| 207155_at    | rs243323 | 16 | 11268703 | A | 0.368  | 5.67 | 4.18 | 1.20E-005 |
| 236994_at    | rs243323 | 16 | 11268703 | A | -0.331 | 4.59 | 3.52 | 5.70E-005 |
| 1559494_at   | rs243323 | 16 | 11268703 | A | -0.324 | 4.4  | 3.29 | 9.90E-005 |
| 228021_at    | rs243323 | 16 | 11268703 | A | 0.326  | 4.44 | 3.48 | 6.30E-005 |
| 226001_at    | rs243323 | 16 | 11268703 | A | -0.331 | 4.59 | 3.47 | 6.30E-005 |
| 236726_at    | rs243323 | 16 | 11268703 | A | 0.328  | 4.48 | 3.33 | 8.90E-005 |
| 238428_at    | rs243323 | 16 | 11268703 | A | 0.342  | 4.9  | 3.71 | 3.60E-005 |
| 231295_at    | rs243323 | 16 | 11268703 | A | 0.33   | 4.53 | 3.29 | 9.90E-005 |
| 1556199_a_at | rs243323 | 16 | 11268703 | A | 0.324  | 4.38 | 3.41 | 7.40E-005 |
| AVG_SNX25    | rs243323 | 16 | 11268703 | A | -0.365 | 5.55 | 4.01 | 1.70E-005 |
| 232425_at    | rs243323 | 16 | 11268703 | A | -0.352 | 5.19 | 3.77 | 3.10E-005 |
| 218829_s_at  | rs243323 | 16 | 11268703 | A | -0.324 | 4.4  | 3.30 | 9.80E-005 |
| 227408_s_at  | rs243323 | 16 | 11268703 | A | -0.356 | 5.26 | 3.90 | 2.30E-005 |
| 230570_at    | rs243323 | 16 | 11268703 | A | -0.347 | 5.05 | 3.66 | 4.10E-005 |
| AVG_C5ORF15  | rs243323 | 16 | 11268703 | A | -0.333 | 4.63 | 3.39 | 7.70E-005 |
| 241063_at    | rs243323 | 16 | 11268703 | A | 0.358  | 5.36 | 4.22 | 1.00E-005 |
| 213610_s_at  | rs243323 | 16 | 11268703 | A | -0.344 | 4.96 | 3.87 | 2.40E-005 |

---

SNPs are represented by more than one transcript. Probe-ID: probe on Affymetrix HG-U133 Plus 2.0 chip Marker: rs ID of SNP Chr: chromosome Pos: genomic position according to NCBI's build 36 (hg18). Allele: allele of effect Effect: estimate of effect size H2: heritability value LOD: logarithm of the odds score (the false discovery rate (FDR) was found to be 0.05 for a LOD score of 6.076 in <sup>2</sup>). P-value: probability value of lod score.

Table S5. Extract from the Catalog of Published Genome-wide association studies<sup>3</sup> ([www.genome.gov/gwastudies](http://www.genome.gov/gwastudies), date of access Dec-01-2011) listing established disease associations for the eleven susceptibility loci shared between CD and PS.

| Date Added to Catalog (since 11/25/08) | First Author/Date/ Journal/Study                                                                                                                                                                        | Disease/Trait                  |
|----------------------------------------|---------------------------------------------------------------------------------------------------------------------------------------------------------------------------------------------------------|--------------------------------|
| <b>1p31.3 (IL23R)</b>                  |                                                                                                                                                                                                         |                                |
| 04/12/11                               | Mells GF March 13, 2011 Nat Genet Genome-wide association study identifies 12 new susceptibility loci for primary biliary cirrhosis.                                                                    | Primary biliary cirrhosis      |
| 03/28/11                               | Dehghan A February 07, 2011 Circulation Meta-analysis of genome-wide association studies in >80 000 subjects identifies multiple loci for C-reactive protein levels.                                    | C-reactive protein             |
| 03/29/11                               | Anderson CA February 06, 2011 Nat Genet Meta-analysis identifies 29 additional ulcerative colitis risk loci, increasing the number of confirmed associations to 47.                                     | Ulcerative colitis             |
| 01/11/11                               | Franke A November 21, 2010 Nat Genet Genome-wide meta-analysis increases to 71 the number of confirmed Crohn's disease susceptibility loci.                                                             | Crohn's disease                |
| 01/06/11                               | Sotoodehnia N November 14, 2010 Nat Genet Common variants in 22 loci are associated with QRS duration and cardiac ventricular conduction.                                                               | Ventricular conduction         |
| 12/03/10                               | Croteau-Chonka DC October 21, 2010 Obesity (Silver Spring) Genome-wide association study of anthropometric traits and evidence of interactions with age and study year in Filipino women.               | Body mass index                |
| 12/03/10                               | NA                                                                                                                                                                                                      | Weight                         |
| 01/18/11                               | Strange A October 17, 2010 Nat Genet A genome-wide association study identifies new psoriasis susceptibility loci and an interaction between HLA-C and ERAP1.                                           | Psoriasis                      |
| 10/17/10                               | Waterworth DM September 23, 2010 Arterioscler Thromb Vasc Biol Genetic variants influencing circulating lipid levels and risk of coronary artery disease.                                               | Triglycerides                  |
| 09/02/10                               | Liu X July 18, 2010 Nat Genet Genome-wide meta-analyses identify three loci associated with primary biliary cirrhosis.                                                                                  | Primary biliary cirrhosis      |
| 08/30/10                               | Mizuki N July 11, 2010 Nat Genet Genome-wide association studies identify IL23R-IL12RB2 and IL10 as Behçet's disease susceptibility loci.                                                               | Behçet's disease               |
| 08/18/10                               | Remmers EF July 11, 2010 Nat Genet Genome-wide association study identifies variants in the MHC class I, IL10, and IL23R-IL12RB2 regions associated with Behçet's disease.                              | Behçet's disease               |
| 07/12/10                               | McGovern DP June 22, 2010 Hum Mol Genet Fucosyltransferase 2 (FUT2) non-secretor status is associated with Crohn's disease.                                                                             | Crohn's disease                |
| 04/02/10                               | McGovern DP March 14, 2010 Nat Genet Genome-wide association identifies multiple ulcerative colitis susceptibility loci.                                                                                | Ulcerative colitis             |
| 03/29/10                               | Dubois PC February 28, 2010 Nat Genet Multiple common variants for celiac disease influencing immune gene expression.                                                                                   | Celiac disease                 |
| 03/17/10                               | Sun Q February 22, 2010 Hum Mol Genet Genome-wide association study identifies polymorphisms in LEPR as determinants of plasma soluble leptin receptor levels.                                          | Soluble leptin receptor levels |
| 02/12/10                               | Shen L January 22, 2010 Neuroimage Whole genome association study of brain-wide imaging phenotypes for identifying quantitative trait loci in MCI and AD: A study of the ADNI cohort.                   | Brain imaging                  |
| 02/02/10                               | Reveille JD January 10, 2010 Nat Genet Genome-wide association study of ankylosing spondylitis identifies non-MHC susceptibility loci.                                                                  | Ankylosing spondylitis         |
| 12/11/09                               | Barrett JC November 15, 2009 Nat Genet Genome-wide association study of ulcerative colitis identifies three new susceptibility loci, including the HNF4A region.                                        | Ulcerative colitis             |
| 10/16/09                               | Rivadeneira F October 04, 2009 Nat Genet Twenty bone-mineral-density loci identified by large-scale meta-analysis of genome-wide association studies.                                                   | Bone mineral density (hip)     |
| 10/16/09                               | NA                                                                                                                                                                                                      | Bone mineral density (spine)   |
| 07/12/09                               | Elliott P July 01, 2009 JAMA Genetic Loci associated with C-reactive protein levels and risk of coronary heart disease.                                                                                 | C-reactive protein             |
| 06/21/09                               | Hirschfield GM May 20, 2009 N Engl J Med Primary biliary cirrhosis associated with HLA, IL12A, and IL12RB2 variants.                                                                                    | Primary biliary cirrhosis      |
| 06/01/09                               | Barrett JC May 10, 2009 Nat Genet Genome-wide association study and meta-analysis find that over 40 loci affect risk of type 1 diabetes.                                                                | Type 1 diabetes                |
| 02/06/09                               | Nair RP January 25, 2009 Nat Genet Genome-wide scan reveals association of psoriasis with IL-23 and NF-kappaB pathways.                                                                                 | Psoriasis                      |
| 01/21/09                               | Silverberg MS January 04, 2009 Nat Genet Ulcerative colitis-risk loci on chromosomes 1p36 and 12q15 found by genome-wide association study.                                                             | Ulcerative colitis             |
| 01/12/09                               | Aulchenko YS December 07, 2008 Nat Genet Loci influencing lipid levels and coronary heart disease risk in 16 European population cohorts.                                                               | Cholesterol, total             |
| 01/12/09                               | NA                                                                                                                                                                                                      | LDL cholesterol                |
| 01/12/09                               | NA                                                                                                                                                                                                      | Triglycerides                  |
| 01/12/09                               | Kathiresan S December 07, 2008 Nat Genet Common variants at 30 loci contribute to polygenic dyslipidemia.                                                                                               | Triglycerides                  |
| 01/12/09                               | Sabatti C December 07, 2008 Nat Genet Genome-wide association analysis of metabolic traits in a birth cohort from a founder population.                                                                 | Metabolic traits               |
| 11/25/08                               | Kugathasan S August 31, 2008 Nat Genet Loci on 20q13 and 21q22 are associated with pediatric-onset inflammatory bowel disease.                                                                          | Inflammatory bowel disease     |
| 11/25/08                               | Barrett JC June 29, 2008 Nat Genet Genome-wide association defines more than 30 distinct susceptibility loci for Crohn's disease.                                                                       | Crohn's disease                |
| 11/25/08                               | Ridker PM April 24, 2008 Am J Hum Genet Loci related to metabolic-syndrome pathways including LEPR,HNF1A, IL6R, and GCKR associate with plasma C-reactive protein: the Women's Genome Health Study.     | C-reactive protein             |
| 11/25/08                               | Kathiresan S January 13, 2008 Nat Genet Six new loci associated with blood low-density lipoprotein cholesterol, high-density lipoprotein cholesterol or triglycerides in humans.                        | Triglycerides                  |
| 11/25/08                               | Willer CJ January 13, 2008 Nat Genet Newly identified loci that influence lipid concentrations and risk of coronary artery disease.                                                                     | Triglycerides                  |
| 11/25/08                               | Levy D September 19, 2007 BMC Med Genet Framingham Heart Study 100K Project: genome-wide associations for blood pressure and arterial stiffness.                                                        | Blood pressure                 |
| 11/25/08                               | Vasan RS September 19, 2007 BMC Med Genet Genome-wide association of echocardiographic dimensions, brachial artery endothelial function and treadmill exercise responses in the Framingham Heart Study. | Echocardiographic traits       |

|                       |                                                                                                                                                                                                |                                               |
|-----------------------|------------------------------------------------------------------------------------------------------------------------------------------------------------------------------------------------|-----------------------------------------------|
| 11/25/08              | Raelson JV September 05, 2007 Proc Natl Acad Sci U S A Genome-wide association study for Crohn's disease in the Quebec Founder Population identifies multiple validated disease loci.          | Crohn's disease                               |
| 11/25/08              | WTCCC June 07, 2007 Nature Genome-wide association study of 14,000 cases of seven common diseases and 3,000 shared controls.                                                                   | Crohn's disease                               |
| 11/25/08              | Rioux JD April 15, 2007 Nat Genet Genome-wide association study identifies new susceptibility loci for Crohn disease and implicates autophagy in disease pathogenesis.                         | Crohn's disease                               |
| 11/25/08              | Libioulle C March 05, 2007 PLoS Genet Novel Crohn disease locus identified by genome-wide association maps to a gene desert on 5p13.1 and modulates expression of PTGER4.                      | Crohn's disease                               |
| 11/25/08              | Duerr RH October 26, 2006 Science A genome-wide association study identifies IL23R as an inflammatory bowel disease gene.                                                                      | Inflammatory bowel disease                    |
| <b>2p16.1 (REL)</b>   |                                                                                                                                                                                                |                                               |
| 05/26/11              | Shaw SY April 21, 2011 Circ Cardiovasc Genet Genetic and clinical correlates of early-outgrowth colony-forming units.                                                                          | Monocyte early outgrowth colony forming units |
| 05/02/11              | Cha PC April 03, 2011 Nat Genet A genome-wide association study identifies three loci associated with susceptibility to uterine fibroids.                                                      | Uterine fibroids                              |
| 04/04/11              | Bhatnagar P February 17, 2011 J Hum Genet Genome-wide association study identifies genetic variants influencing F-cell levels in sickle-cell patients.                                         | F-cell distribution                           |
| 03/29/11              | Anderson CA February 06, 2011 Nat Genet Meta-analysis identifies 29 additional ulcerative colitis risk loci, increasing the number of confirmed associations to 47.                            | Ulcerative colitis                            |
| 03/18/11              | Festen EA January 27, 2011 PLoS Genet A meta-analysis of genome-wide association scans identifies IL18RAP, PTPN2, TAGAP, and PUS10 as shared risk loci for Crohn's disease and celiac disease. | Crohn's disease and Celiac disease            |
| 01/08/11              | Elks CE November 21, 2010 Nat Genet Thirty new loci for age at menarche identified by a meta-analysis of genome-wide association studies.                                                      | Menarche (age at onset)                       |
| 01/11/11              | Franke A November 21, 2010 Nat Genet Genome-wide meta-analysis increases to 71 the number of confirmed Crohn's disease susceptibility loci.                                                    | Crohn's disease                               |
| 01/03/11              | Enciso-Mora V October 31, 2010 Nat Genet A genome-wide association study of Hodgkin's lymphoma identifies new susceptibility loci at 2p16.1 (REL), 8q24.21 and 10p14 (GATA3).                  | Hodgkin's lymphoma                            |
| 01/18/11              | Strange A October 17, 2010 Nat Genet A genome-wide association study identifies new psoriasis susceptibility loci and an interaction between HLA-C and ERAP1.                                  | Psoriasis                                     |
| 12/01/10              | Stuart PE October 17, 2010 Nat Genet Genome-wide association analysis identifies three psoriasis susceptibility loci.                                                                          | Psoriasis                                     |
| 11/17/10              | Speliotes EK October 10, 2010 Nat Genet Association analyses of 249,796 individuals reveal 18 new loci associated with body mass index.                                                        | Body mass index                               |
| 07/12/10              | Voight BF June 27, 2010 Nat Genet Twelve type 2 diabetes susceptibility loci identified through large-scale association analysis.                                                              | Type 2 diabetes                               |
| 06/13/10              | Stahl EA May 09, 2010 Nat Genet Genome-wide association study meta-analysis identifies seven new rheumatoid arthritis risk loci.                                                               | Rheumatoid arthritis                          |
| 05/11/10              | Liu JZ April 01, 2010 Twin Res Hum Genet Genome-wide association study of height and body mass index in Australian twin families.                                                              | Height                                        |
| 04/02/10              | McGovern DP March 14, 2010 Nat Genet Genome-wide association identifies multiple ulcerative colitis susceptibility loci.                                                                       | Ulcerative colitis                            |
| 04/06/10              | Adkins DE March 02, 2010 Mol Psychiatry Genomewide pharmacogenomic study of metabolic side effects to antipsychotic drugs.                                                                     | Response to antipsychotic treatment           |
| 03/29/10              | Dubois PC February 28, 2010 Nat Genet Multiple common variants for celiac disease influencing immune gene expression.                                                                          | Celiac disease                                |
| 03/25/10              | Okada Y February 26, 2010 Hum Mol Genet A genome-wide association study in 19 633 Japanese subjects identified LHX3-QSOX2 and IGF1 as adult height loci.                                       | Height                                        |
| 01/19/10              | Fellay J December 24, 2009 PLoS Genet Common genetic variation and the control of HIV-1 in humans.                                                                                             | HIV-1 control                                 |
| 12/28/09              | Nuinoon M November 19, 2009 Hum Genet A genome-wide association identified the common genetic variants influence disease severity in beta0-thalassemia/hemoglobin E.                           | Beta thalassemia/hemoglobin E disease         |
| 12/04/09              | Kim JJ November 06, 2009 J Hum Genet Identification of 15 loci influencing height in a Korean population.                                                                                      | Height                                        |
| 11/03/09              | Ganesh SK October 11, 2009 Nat Genet Multiple loci influence erythrocyte phenotypes in the CHARGE Consortium.                                                                                  | Mean corpuscular volume                       |
| 07/10/09              | Stefansson H July 01, 2009 Nature Common variants conferring risk of schizophrenia.                                                                                                            | Schizophrenia                                 |
| 07/01/09              | Cotsapas C June 24, 2009 Hum Mol Genet Common body mass index-associated variants confer risk of extreme obesity.                                                                              | Obesity (extreme)                             |
| 06/17/09              | Gregersen PK June 07, 2009 Nat Genet REL, encoding a member of the NF-kappaB family of transcription factors, is a newly defined risk locus for rheumatoid arthritis.                          | Rheumatoid arthritis                          |
| 06/04/09              | Landers JE May 18, 2009 Proc Natl Acad Sci U S A Reduced expression of the Kinesin-Associated Protein 3 (KIFAP3) gene increases survival in sporadic amyotrophic lateral sclerosis.            | Amyotrophic lateral sclerosis                 |
| 05/05/09              | Cho YS April 26, 2009 Nat Genet A large-scale genome-wide association study of Asian populations uncovers genetic factors influencing eight quantitative traits.                               | Height                                        |
| 11/25/08              | Gudbjartsson DF April 06, 2008 Nat Genet Many sequence variants affecting diversity of adult human height.                                                                                     | Height                                        |
| 11/25/08              | Weedon MN April 06, 2008 Nat Genet Genome-wide association analysis identifies 20 loci that influence adult height.                                                                            | Height                                        |
| 11/25/08              | Murabito JM September 19, 2007 BMC Med Genet A genome-wide association study of breast and prostate cancer in the NHLBI's Framingham Heart Study.                                              | Breast cancer                                 |
| 11/25/08              | Menzel S September 02, 2007 Nat Genet A QTL influencing F cell production maps to a gene encoding a zinc-finger protein on chromosome 2p15.                                                    | F-cell distribution                           |
| <b>5q33.3 (IL12B)</b> |                                                                                                                                                                                                |                                               |
| 04/07/11              | Chung SA March 03, 2011 PLoS Genet Differential genetic associations for systemic lupus erythematosus based on anti-dsDNA autoantibody production.                                             | Systemic lupus erythematosus                  |
| 04/07/11              | Alliey-Rodriguez N March 02, 2011 Psychiatr Genet Genome-wide association study of personality traits in bipolar patients.                                                                     | Personality dimensions                        |
| 03/29/11              | Anderson CA February 06, 2011 Nat Genet Meta-analysis identifies 29 additional ulcerative colitis risk loci, increasing the number of confirmed associations to 47.                            | Ulcerative colitis                            |
| 12/01/10              | Ellinghaus E October 17, 2010 Nat Genet Genome-wide association study identifies a psoriasis susceptibility locus at TRAF3IP2.                                                                 | Psoriasis                                     |
| 11/30/10              | Huffmeier U October 17, 2010 Nat Genet Common variants at TRAF3IP2 are associated with susceptibility to psoriatic arthritis and psoriasis.                                                    | Psoriatic arthritis                           |
| 01/18/11              | Strange A October 17, 2010 Nat Genet A genome-wide association study identifies new psoriasis susceptibility loci and an interaction between HLA-C and ERAP1.                                  | Psoriasis                                     |
| 10/29/10              | Wang KS October 01, 2010 Schizophr Res A genome-wide meta-analysis identifies novel loci associated with schizophrenia and bipolar disorder.                                                   | Bipolar disorder and schizophrenia            |

|                        |                                                                                                                                                                                                                                             |                                                               |
|------------------------|---------------------------------------------------------------------------------------------------------------------------------------------------------------------------------------------------------------------------------------------|---------------------------------------------------------------|
| 07/12/10               | McGovern DP June 22, 2010 Hum Mol Genet Fucosyltransferase 2 (FUT2) non-secretor status is associated with Crohn's disease.                                                                                                                 | Crohn's disease                                               |
| 01/13/10               | Hancock DB December 13, 2009 Nat Genet Meta-analyses of genome-wide association studies identify multiple loci associated with pulmonary function.                                                                                          | Pulmonary function                                            |
| 10/30/09               | Soranzo N October 11, 2009 Nat Genet A genome-wide meta-analysis identifies 22 loci associated with eight hematological parameters in the HaemGen consortium.                                                                               | Mean platelet volume                                          |
| 03/30/09               | Polasek O February 01, 2009 Croat Med J Genome-wide association study of anthropometric traits in Korcula Island, Croatia.                                                                                                                  | Anthropometric traits                                         |
| 02/06/09               | Nair RP January 25, 2009 Nat Genet Genome-wide scan reveals association of psoriasis with IL-23 and NF-kappaB pathways.                                                                                                                     | Psoriasis                                                     |
| 02/07/09               | Zhang XJ January 25, 2009 Nat Genet Psoriasis genome-wide association study identifies susceptibility variants within LCE gene cluster at 1q21.                                                                                             | Psoriasis                                                     |
| 01/12/09               | Kathiresan S December 07, 2008 Nat Genet Common variants at 30 loci contribute to polygenic dyslipidemia.                                                                                                                                   | LDL cholesterol                                               |
| 11/25/08               | Barrett JC June 29, 2008 Nat Genet Genome-wide association defines more than 30 distinct susceptibility loci for Crohn's disease.                                                                                                           | Crohn's disease                                               |
| 11/25/08               | Parkes M June 06, 2007 Nat Genet Sequence variants in the autophagy gene IRGM and multiple other replicating loci contribute to Crohn's disease susceptibility.                                                                             | Crohn's disease                                               |
| <b>9p24.1 (JAK2)</b>   |                                                                                                                                                                                                                                             |                                                               |
| 03/29/11               | Anderson CA February 06, 2011 Nat Genet Meta-analysis identifies 29 additional ulcerative colitis risk loci, increasing the number of confirmed associations to 47.                                                                         | Ulcerative colitis                                            |
| 01/19/11               | Petrovski S December 14, 2010 AIDS Common human genetic variants and HIV-1 susceptibility: a genome-wide survey in a homogeneous African population.                                                                                        | HIV-1 susceptibility                                          |
| 11/23/10               | Niu N October 05, 2010 Genome Res Radiation pharmacogenomics: a genome-wide association approach to identify radiation response biomarkers using human lymphoblastoid cell lines.                                                           | Radiation response                                            |
| 10/14/10               | Moffatt MF September 23, 2010 N Engl J Med A large-scale, consortium-based genomewide association study of asthma.                                                                                                                          | Asthma                                                        |
| 07/16/10               | Eriksson N June 24, 2010 PLoS Genet Web-based, participant-driven studies yield novel genetic associations for common traits.                                                                                                               | Common traits (Other)                                         |
| 06/22/10               | Johnson AD June 06, 2010 Nat Genet Genome-wide meta-analyses identifies seven loci associated with platelet aggregation in response to agonists.                                                                                            | Platelet aggregation                                          |
| 04/02/10               | McGovern DP March 14, 2010 Nat Genet Genome-wide association identifies multiple ulcerative colitis susceptibility loci.                                                                                                                    | Ulcerative colitis                                            |
| 03/17/10               | Tsai FJ February 19, 2010 PLoS Genet A genome-wide association study identifies susceptibility variants for type 2 diabetes in Han Chinese.                                                                                                 | Type 2 diabetes                                               |
| 12/14/09               | Asano K November 15, 2009 Nat Genet A genome-wide association study identifies three new susceptibility loci for ulcerative colitis in the Japanese population.                                                                             | Ulcerative colitis                                            |
| 11/03/09               | Ganesh SK October 11, 2009 Nat Genet Multiple loci influence erythrocyte phenotypes in the CHARGE Consortium.                                                                                                                               | Mean corpuscular hemoglobin                                   |
| 11/03/09               | NA                                                                                                                                                                                                                                          | Mean corpuscular volume                                       |
| 10/30/09               | Soranzo N October 11, 2009 Nat Genet A genome-wide meta-analysis identifies 22 loci associated with eight hematological parameters in the HaemGen consortium.                                                                               | Hematological parameters                                      |
| 03/31/09               | Kilpivaara O March 15, 2009 Nat Genet A germline JAK2 SNP is associated with predisposition to the development of JAK2(V617F)-positive myeloproliferative neoplasms.                                                                        | Myeloproliferative neoplasms                                  |
| 12/09/08               | Anney RJ October 24, 2008 Am J Med Genet B Neuropsychiatr Genet Conduct disorder and ADHD: evaluation of conduct problems as a categorical and quantitative trait in the international multicentre ADHD genetics study.                     | Attention deficit hyperactivity disorder and conduct disorder |
| 11/25/08               | Schormair B July 27, 2008 Nat Genet PTPRD (protein tyrosine phosphatase receptor type delta) is associated with restless legs syndrome.                                                                                                     | Restless legs syndrome                                        |
| 11/25/08               | Barrett JC June 29, 2008 Nat Genet Genome-wide association defines more than 30 distinct susceptibility loci for Crohn's disease.                                                                                                           | Crohn's disease                                               |
| <b>10q22.3 (ZMIZ1)</b> |                                                                                                                                                                                                                                             |                                                               |
| 01/11/11               | Franke A November 21, 2010 Nat Genet Genome-wide meta-analysis increases to 71 the number of confirmed Crohn's disease susceptibility loci.                                                                                                 | Crohn's disease                                               |
| 10/16/10               | Lango Allen H September 29, 2010 Nature Hundreds of variants clustered in genomic loci and biological pathways affect human height.                                                                                                         | Height                                                        |
| 06/22/10               | Quan C June 06, 2010 Nat Genet Genome-wide association study for vitiligo identifies susceptibility loci at 6q27 and the MHC.                                                                                                               | Vitiligo                                                      |
| 06/02/10               | Turnbull C May 09, 2010 Nat Genet Genome-wide association study identifies five new breast cancer susceptibility loci.                                                                                                                      | Breast cancer                                                 |
| 05/23/10               | Morrison AC April 17, 2010 Circ Cardiovasc Genet Genomic variation associated with mortality among adults of European and African ancestry with heart failure: the cohorts for heart and aging research in genomic epidemiology consortium. | Mortality among heart failure patients                        |
| 03/29/10               | Dubois PC February 28, 2010 Nat Genet Multiple common variants for celiac disease influencing immune gene expression.                                                                                                                       | Celiac disease<br>Inflammatory bowel disease (early onset)    |
| 12/10/09               | Imielinski M November 15, 2009 Nat Genet Common variants at five new loci associated with early-onset inflammatory bowel disease.                                                                                                           |                                                               |
| 06/29/09               | De Jager PL June 14, 2009 Nat Genet Meta-analysis of genome scans and replication identify CD6, IRF8 and TNFRSF1A as new multiple sclerosis susceptibility loci.                                                                            | Multiple sclerosis                                            |
| 12/09/08               | Sonuga-Barke EJ October 07, 2008 Am J Med Genet B Neuropsychiatr Genet Does parental expressed emotion moderate genetic effects in ADHD? An exploration using a genome wide association scan.                                               | Conduct disorder (interaction)                                |
| 11/25/08               | Ferreira MA August 17, 2008 Nat Genet Collaborative genome-wide association analysis supports a role for ANK3 and CACNA1C in bipolar disorder.                                                                                              | Bipolar disorder                                              |
| <b>11q13.1 (PRDX5)</b> |                                                                                                                                                                                                                                             |                                                               |
| 04/12/11               | Mells GF March 13, 2011 Nat Genet Genome-wide association study identifies 12 new susceptibility loci for primary biliary cirrhosis.                                                                                                        | Primary biliary cirrhosis                                     |
| 01/11/11               | Franke A November 21, 2010 Nat Genet Genome-wide meta-analysis increases to 71 the number of confirmed Crohn's disease susceptibility loci.                                                                                                 | Crohn's disease                                               |
| 10/15/10               | Yang Q September 30, 2010 Circ Cardiovasc Genet Multiple genetic loci influence serum urate levels and their relationship with gout and cardiovascular disease risk factors.                                                                | Serum urate                                                   |
| 10/16/10               | Lango Allen H September 29, 2010 Nature Hundreds of variants clustered in genomic loci and biological pathways affect human height.                                                                                                         | Height                                                        |
| 09/24/10               | Chalasani N August 10, 2010 Gastroenterology Genome-wide association study identifies variants associated with histologic features of nonalcoholic Fatty liver disease.                                                                     | Non-alcoholic fatty liver disease histology (lobular)         |
| 08/12/10               | Petukhova L July 01, 2010 Nature Genome-wide association study in alopecia areata implicates both innate and adaptive immunity.                                                                                                             | Alopecia areata                                               |

|                         |                                                                                                                                                                           |                                          |
|-------------------------|---------------------------------------------------------------------------------------------------------------------------------------------------------------------------|------------------------------------------|
| 07/12/10                | Ramdas WD June 10, 2010 PLoS Genet A genome-wide association study of optic disc parameters.                                                                              | Vertical cup-disc ratio                  |
| 05/05/10                | Kottgen A April 11, 2010 Nat Genet New loci associated with kidney function and chronic kidney disease.                                                                   | Chronic kidney disease                   |
| 06/22/09                | Kolz M June 05, 2009 PLoS Genet Meta-analysis of 28,141 individuals identifies common variants within five new loci that influence uric acid concentrations.              | Serum uric acid                          |
| 05/14/09                | Scott LJ May 05, 2009 Proc Natl Acad Sci U S A Genome-wide association and meta-analysis of bipolar disorder in individuals of European ancestry.                         | Bipolar disorder                         |
| <b>16p13.13 (SOCS1)</b> |                                                                                                                                                                           |                                          |
| 04/12/11                | Mells GF March 13, 2011 Nat Genet Genome-wide association study identifies 12 new susceptibility loci for primary biliary cirrhosis.                                      | Primary biliary cirrhosis                |
| 04/07/11                | Lettre G February 10, 2011 PLoS Genet Genome-wide association study of coronary heart disease and its risk factors in 8,090 African Americans: the NHLBI CARE Project.    | Coronary heart disease                   |
| 09/07/10                | Mick E May 14, 2010 J Am Acad Child Adolesc Psychiatry Family-based genome-wide association scan of attention-deficit/hyperactivity disorder.                             | Attention deficit hyperactivity disorder |
| 04/02/10                | McGovern DP March 14, 2010 Nat Genet Genome-wide association identifies multiple ulcerative colitis susceptibility loci.                                                  | Ulcerative colitis                       |
| 04/06/10                | Adkins DE March 02, 2010 Mol Psychiatry Genomewide pharmacogenomic study of metabolic side effects to antipsychotic drugs.                                                | Response to antipsychotic treatment      |
| 03/29/10                | Dubois PC February 28, 2010 Nat Genet Multiple common variants for celiac disease influencing immune gene expression.                                                     | Celiac disease                           |
| 06/29/09                | De Jager PL June 14, 2009 Nat Genet Meta-analysis of genome scans and replication identify CD6, IRF8 and TNFRSF1A as new multiple sclerosis susceptibility loci.          | Multiple sclerosis                       |
| 06/01/09                | Barrett JC May 10, 2009 Nat Genet Genome-wide association study and meta-analysis find that over 40 loci affect risk of type 1 diabetes.                                  | Type 1 diabetes                          |
| 03/31/09                | Newton-Cheh C March 22, 2009 Nat Genet Common variants at ten loci influence QT interval duration in the QTGEN Study.                                                     | QT interval                              |
| 04/02/09                | Pfeufer A March 22, 2009 Nat Genet Common variants at ten loci modulate the QT interval duration in the QTSCD Study.                                                      | QT interval                              |
| 11/25/08                | Cooper JD November 02, 2008 Nat Genet Meta-analysis of genome-wide association study data identifies additional type 1 diabetes risk loci.                                | Type 1 diabetes                          |
| 11/25/08                | Hafner DA July 29, 2007 N Engl J Med Risk alleles for multiple sclerosis identified by a genomewide study.                                                                | Multiple sclerosis                       |
| 11/25/08                | Hakonarson H July 15, 2007 Nature A genome-wide association study identifies KIAA0350 as a type 1 diabetes gene.                                                          | Type 1 diabetes                          |
| 11/25/08                | WTCCC June 07, 2007 Nature Genome-wide association study of 14,000 cases of seven common diseases and 3,000 shared controls.                                              | Type 1 diabetes                          |
| 11/25/08                | Todd JA June 06, 2007 Nat Genet Robust associations of four new chromosome regions from genome-wide analyses of type 1 diabetes.                                          | Type 1 diabetes                          |
| <b>17q21.2 (STAT3)</b>  |                                                                                                                                                                           |                                          |
| 03/07/10                | Jakkula E February 12, 2010 Am J Hum Genet Genome-wide association study in a high-risk isolate for multiple sclerosis reveals associated variants in STAT3 gene.         | Multiple sclerosis                       |
| 12/04/09                | Kim JJ November 06, 2009 J Hum Genet Identification of 15 loci influencing height in a Korean population.                                                                 | Height                                   |
| 06/01/09                | Barrett JC May 10, 2009 Nat Genet Genome-wide association study and meta-analysis find that over 40 loci affect risk of type 1 diabetes.                                  | Type 1 diabetes                          |
| 11/25/08                | Barrett JC June 29, 2008 Nat Genet Genome-wide association defines more than 30 distinct susceptibility loci for Crohn's disease.                                         | Crohn's disease                          |
| <b>19p13.2 (TYK2)</b>   |                                                                                                                                                                           |                                          |
| 05/27/11                | Pare G April 21, 2011 PLoS Genet Genome-wide association analysis of soluble ICAM-1 concentration reveals novel associations at the NFKB1K, PNPLA3, RELA, and SH2B3 loci. | Soluble ICAM-1                           |
| 04/13/11                | Grassi MA March 26, 2011 Hum Mol Genet Genome-wide meta-analysis for severe diabetic retinopathy.                                                                         | Diabetic retinopathy                     |
| 04/11/11                | Schunkert H March 06, 2011 Nat Genet Large-scale association analysis identifies 13 new susceptibility loci for coronary artery disease.                                  | Coronary heart disease                   |
| 04/07/11                | Lettre G February 10, 2011 PLoS Genet Genome-wide association study of coronary heart disease and its risk factors in 8,090 African Americans: the NHLBI CARE Project.    | Coronary heart disease                   |
| 01/08/11                | Elks CE November 21, 2010 Nat Genet Thirty new loci for age at menarche identified by a meta-analysis of genome-wide association studies.                                 | Menarche (age at onset)                  |
| 01/11/11                | Franke A November 21, 2010 Nat Genet Genome-wide meta-analysis increases to 71 the number of confirmed Crohn's disease susceptibility loci.                               | Crohn's disease                          |
| 01/18/11                | Strange A October 17, 2010 Nat Genet A genome-wide association study identifies new psoriasis susceptibility loci and an interaction between HLA-C and ERAP1.             | Psoriasis                                |
| 10/16/10                | Lango Allen H September 29, 2010 Nature Hundreds of variants clustered in genomic loci and biological pathways affect human height.                                       | Height                                   |
| 10/17/10                | Waterworth DM September 23, 2010 Arterioscler Thromb Vasc Biol Genetic variants influencing circulating lipid levels and risk of coronary artery disease.                 | LDL cholesterol                          |
| 07/14/10                | Nischwitz S June 30, 2010 J Neuroimmunol Evidence for VAV2 and ZNF433 as susceptibility genes for multiple sclerosis.                                                     | Multiple sclerosis                       |
| 05/10/10                | Pelak K April 15, 2010 J Infect Dis Host determinants of HIV-1 control in African Americans.                                                                              | HIV-1 control                            |
| 03/15/10                | Barbalic M February 18, 2010 Hum Mol Genet Large-scale genomic studies reveal central role of ABO in sP-selectin and sICAM-1 levels.                                      | Soluble levels of adhesion molecules     |
| 03/05/10                | Cirulli ET February 03, 2010 Eur J Hum Genet Common genetic variation and performance on standardized cognitive tests.                                                    | Cognitive test performance               |
| 12/28/09                | Wallace C December 06, 2009 Nat Genet The imprinted DLK1-MEG3 gene region on chromosome 14q32.2 alters susceptibility to type 1 diabetes.                                 | Type 1 diabetes                          |
| 11/04/09                | Hicks AA October 02, 2009 PLoS Genet Genetic determinants of circulating sphingolipid concentrations in European populations.                                             | Sphingolipid levels                      |
| 03/01/09                | Kathiresan S February 08, 2009 Nat Genet Genome-wide association of early-onset myocardial infarction with single nucleotide polymorphisms and copy number variants.      | Myocardial infarction (early onset)      |
| 01/12/09                | Aulchenko YS December 07, 2008 Nat Genet Loci influencing lipid levels and coronary heart disease risk in 16 European population cohorts.                                 | Cholesterol, total                       |
| 01/12/09                | NA                                                                                                                                                                        | LDL cholesterol                          |
| 01/12/09                | Kathiresan S December 07, 2008 Nat Genet Common variants at 30 loci contribute to polygenic dyslipidemia.                                                                 | HDL cholesterol                          |
| 01/12/09                | NA                                                                                                                                                                        | LDL cholesterol                          |
| 01/12/09                | Sabatti C December 07, 2008 Nat Genet Genome-wide association analysis of metabolic traits in a birth cohort from a founder population.                                   | LDL cholesterol                          |



|                        |                                                                                                                                                                                  |                                              |
|------------------------|----------------------------------------------------------------------------------------------------------------------------------------------------------------------------------|----------------------------------------------|
| 01/16/09               | Baranzini SE November 14, 2008 Hum Mol Genet Genome-wide association analysis of susceptibility and clinical phenotype in multiple sclerosis.                                    | Multiple sclerosis (severity)                |
| 11/25/08               | Pare G July 04, 2008 PLoS Genet Novel association of ABO histo-blood group antigen with soluble ICAM-1: results of a genome-wide association study of 6,578 women.               | Soluble ICAM-1                               |
| 11/25/08               | Melzer D May 09, 2008 PLoS Genet A genome-wide association study identifies protein quantitative trait loci (pQTLs).                                                             | Protein quantitative trait loci              |
| 11/25/08               | Gudbjartsson DF April 06, 2008 Nat Genet Many sequence variants affecting diversity of adult human height.                                                                       | Height                                       |
| 11/25/08               | Kathiresan S January 13, 2008 Nat Genet Six new loci associated with blood low-density lipoprotein cholesterol, high-density lipoprotein cholesterol or triglycerides in humans. | LDL cholesterol                              |
| 11/25/08               | Willer CJ January 13, 2008 Nat Genet Newly identified loci that influence lipid concentrations and risk of coronary artery disease.                                              | LDL cholesterol                              |
| <b>19q13.33 (FUT2)</b> |                                                                                                                                                                                  |                                              |
| 05/26/11               | Zhai G April 14, 2011 PLoS Genet Eight common genetic variants associated with serum DHEAS levels suggest a key role in ageing mechanisms.                                       | Serum dehydroepiandrosterone sulphate levels |
| 04/12/11               | Mells GF March 13, 2011 Nat Genet Genome-wide association study identifies 12 new susceptibility loci for primary biliary cirrhosis.                                             | Primary biliary cirrhosis                    |
| 01/13/11               | Gudmundsson J December 15, 2010 Sci Transl Med Genetic correction of PSA values using sequence variants associated with PSA levels.                                              | Serum prostate-specific antigen levels       |
| 01/11/11               | Franke A November 21, 2010 Nat Genet Genome-wide meta-analysis increases to 71 the number of confirmed Crohn's disease susceptibility loci.                                      | Crohn's disease                              |
| 12/16/10               | Ikram MK October 28, 2010 PLoS Genet Four novel Loci (19q13, 6q24, 12q24, and 5q14) influence the microcirculation in vivo.                                                      | Retinal vascular caliber                     |
| 09/02/10               | Liu X July 18, 2010 Nat Genet Genome-wide meta-analyses identify three loci associated with primary biliary cirrhosis.                                                           | Primary biliary cirrhosis                    |
| 07/12/10               | McGovern DP June 22, 2010 Hum Mol Genet Fucosyltransferase 2 (FUT2) non-secretor status is associated with Crohn's disease.                                                      | Crohn's disease                              |
| 04/15/10               | Kamatani Y February 07, 2010 Nat Genet Genome-wide association study of hematological and biochemical traits in a Japanese population.                                           | Hematological and biochemical traits         |
| 04/01/09               | Tanaka T March 18, 2009 Am J Hum Genet Genome-wide association study of vitamin B6, vitamin B12, folate, and homocysteine blood concentrations.                                  | Folate pathway vitamin levels                |
| 02/26/09               | Otowa T January 23, 2009 J Hum Genet Genome-wide association study of panic disorder in the Japanese population.                                                                 | Panic disorder                               |
| 12/09/08               | Bertram L October 29, 2008 Am J Hum Genet Genome-wide association analysis reveals putative Alzheimer's disease susceptibility loci in addition to APOE.                         | Alzheimer's disease                          |
| 11/25/08               | Hazra A September 07, 2008 Nat Genet Common variants of FUT2 are associated with plasma vitamin B12 levels.                                                                      | Plasma level of vitamin B12                  |
| 11/25/08               | Eeles RA February 10, 2008 Nat Genet Multiple newly identified loci associated with prostate cancer susceptibility.                                                              | Prostate cancer                              |
| <b>22q11.21 (YDJC)</b> |                                                                                                                                                                                  |                                              |
| 04/07/11               | Chung SA March 03, 2011 PLoS Genet Differential genetic associations for systemic lupus erythematosus based on anti-dsDNA autoantibody production.                               | Systemic lupus erythematosus                 |
| 04/06/11               | Zhernakova A February 24, 2011 PLoS Genet Meta-analysis of genome-wide association studies in celiac disease and rheumatoid arthritis identifies fourteen non-HLA shared loci.   | Celiac disease and Rheumatoid arthritis      |
| 01/11/11               | Franke A November 21, 2010 Nat Genet Genome-wide meta-analysis increases to 71 the number of confirmed Crohn's disease susceptibility loci.                                      | Crohn's disease                              |
| 03/29/10               | Dubois PC February 28, 2010 Nat Genet Multiple common variants for celiac disease influencing immune gene expression.                                                            | Celiac disease                               |
| 04/15/10               | Kamatani Y February 07, 2010 Nat Genet Genome-wide association study of hematological and biochemical traits in a Japanese population.                                           | Hematological and biochemical traits         |
| 11/09/09               | Han JW October 18, 2009 Nat Genet Genome-wide association study in a Chinese Han population identifies nine new susceptibility loci for systemic lupus erythematosus.            | Systemic lupus erythematosus                 |

## References

1. Franke, A., McGovern, D.P., Barrett, J.C., Wang, K., Radford-Smith, G.L., Ahmad, T., Lees, C.W., Balschun, T., Lee, J., Roberts, R., et al. (2010). Genome-wide meta-analysis increases to 71 the number of confirmed Crohn's disease susceptibility loci. *Nature genetics* 42, 1118-1125.
2. Dixon, A.L., Liang, L., Moffatt, M.F., Chen, W., Heath, S., Wong, K.C., Taylor, J., Burnett, E., Gut, I., Farrall, M., et al. (2007). A genome-wide association study of global gene expression. *Nature genetics* 39, 1202-1207.
3. Hindorff, L.A., Sethupathy, P., Junkins, H.A., Ramos, E.M., Mehta, J.P., Collins, F.S., and Manolio, T.A. (2009). Potential etiologic and functional implications of genome-wide association loci for human diseases and traits. *Proc Natl Acad Sci U S A* 106, 9362-9367.
